# Supplementary material for: Multifunctional one-droplet microfluidic chemosensing of ractopamine in real samples: a user-oriented flexible nano-architecture for on-site food and pharmaceutical analysis using optical sensors
Source: Royal Society of Chemistry journal article supplement (doi:10.1039/d3ay01064c), 2023-01-01
Supplement: d3ay01064c7.pdf [file d3ay01064c7.pdf]

## Supporting Information

### **Multifunctional open-droplet microfluidic chemosensing of ractopamine in real sample: A user-oriented flexible nano-architecture for *on-site* food and pharmaceutical analysis**

Hossein Navay Baghban <sup>1</sup>, Mohammad Hasanzadeh <sup>2,\*</sup>

<sup>1</sup> Nutrition Research Center, Tabriz University of Medical Sciences, Tabriz, Iran.

<sup>2</sup> Pharmaceutical Analysis Research Center, Tabriz University of Medical Sciences, Tabriz, Iran.

- **Correspondence:**

Mohammad Hasanzadeh; [\\*hasanzadehm@tbzmed.ac.ir](mailto:*hasanzadehm@tbzmed.ac.ir)

Pharmaceutical Analysis Research Center, Tabriz University of Medical Sciences, Tabriz, Iran.

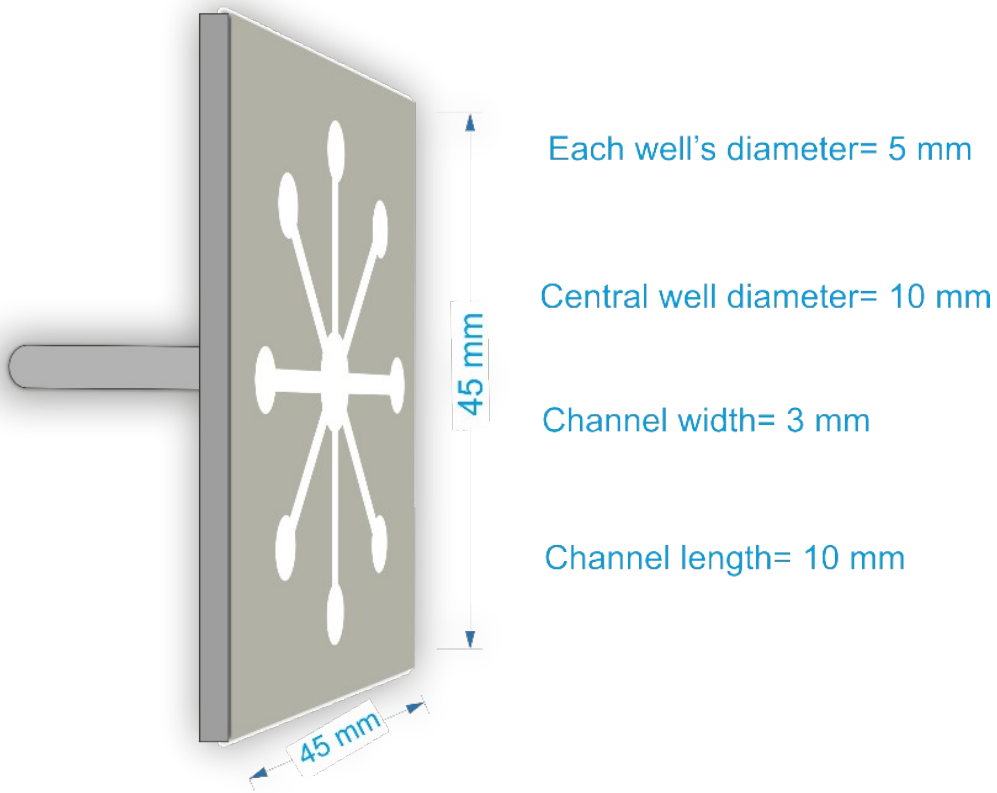

**Scheme. S1.** Dimensional figures of the iron stencil.

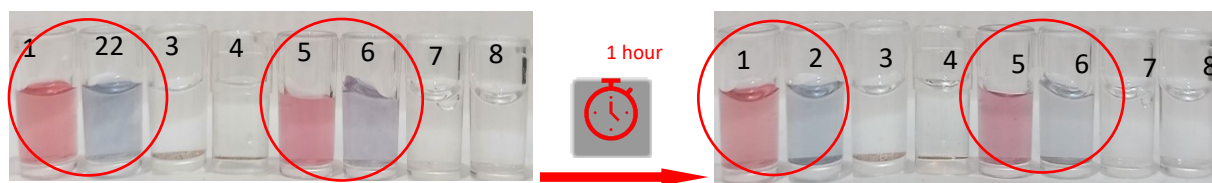

**Fig. S1.** Photographic images of **1.** AuNPs-CysA, **2.** AuNPs-CysA+ RAC (1:1), **3.** Positively charged AuNPs, **4.** AuNPs Black+ RAC (1:1), **5.** AuNPs-DDT, **6.** AuNPs-DDT+ RAC (1:1), **7.** GNSs, **8.** Gold nano-stars (GNSs) + RAC (1:1) at the moment of reaction and one hour later.

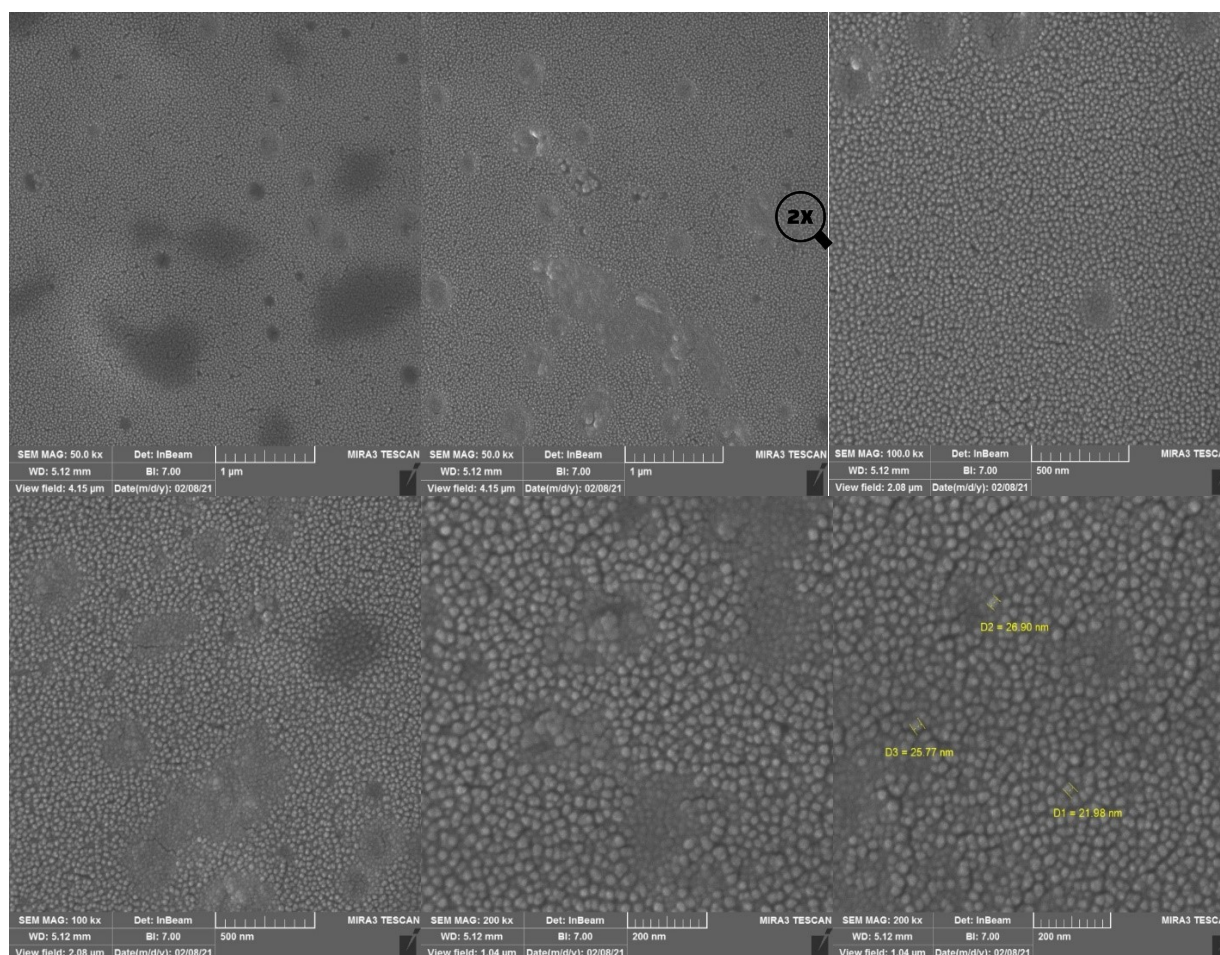

**Fig. S2.** FE-SEM graphs of AuNPs-CysA from a view field of 4.15  $\mu\text{m}$  to 1.04  $\mu\text{m}$ .

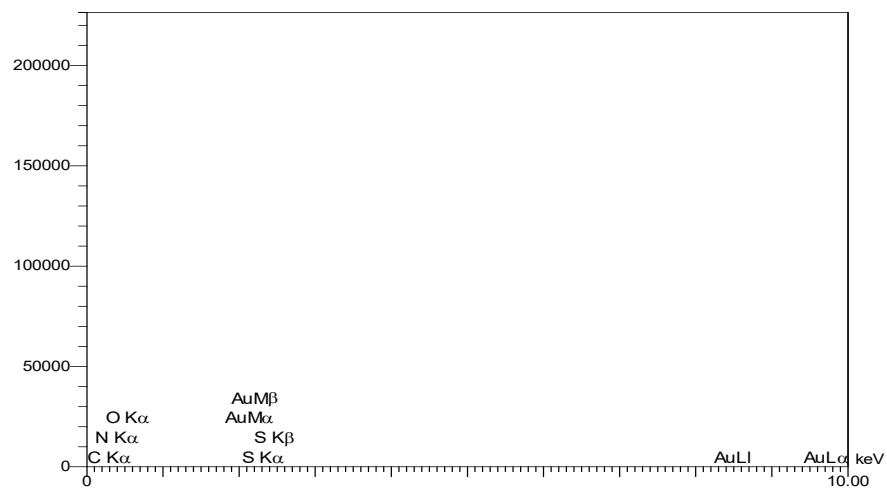

**Fig. S3.** EDAX-EDS diagram for AuNPs-CysA.

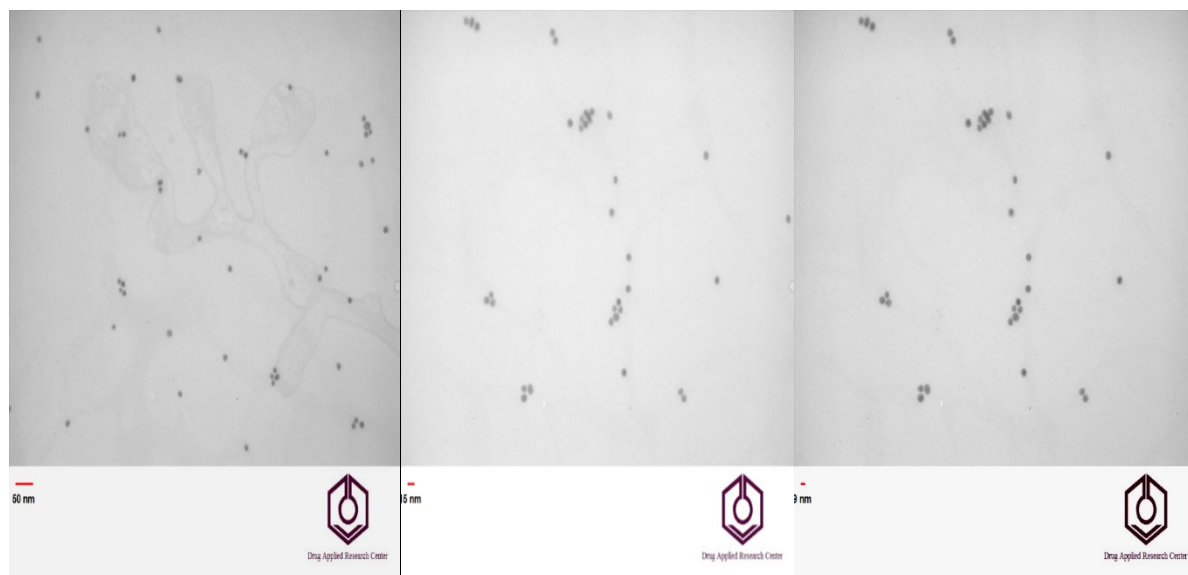

**Fig. S4.** TEM images of AuNPs-CysA in three different magnifications.



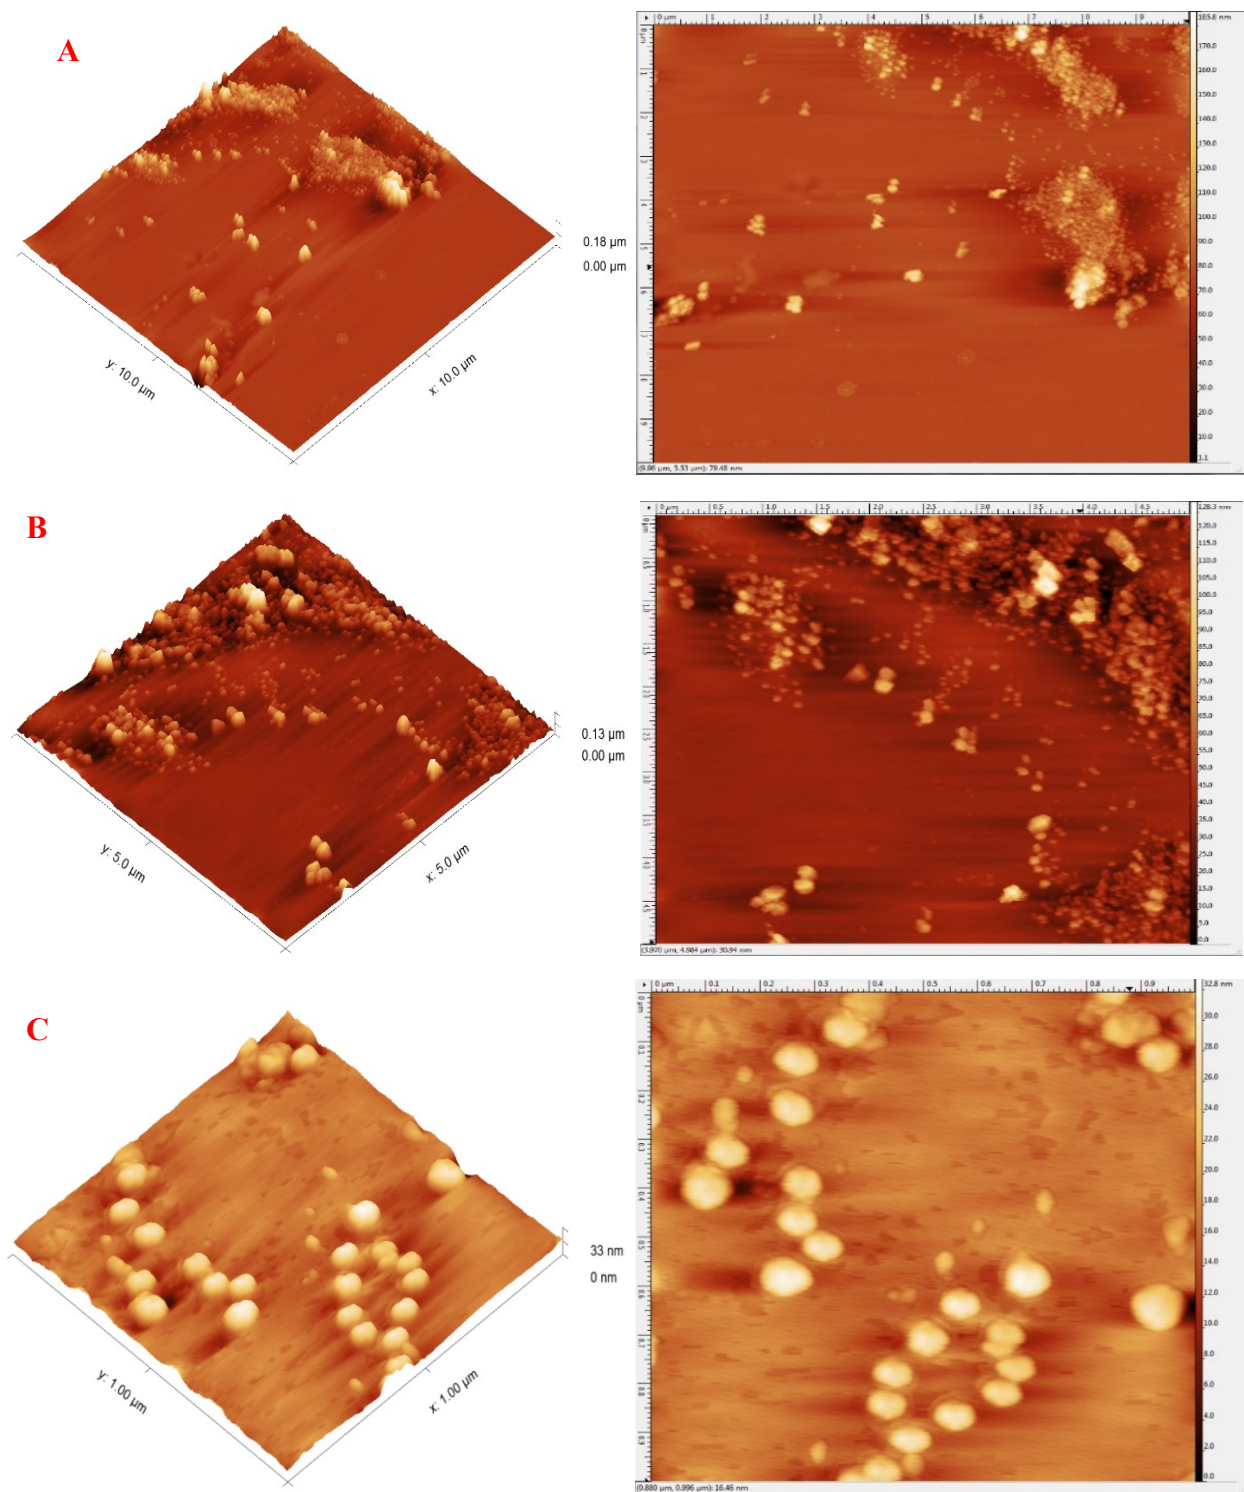

**Fig. S5.** Topographic 3D and 2D AFM figures of Au NPs-CysA in square view fields of **A)** 10  $\mu\text{m}^2$ , **B)** 5  $\mu\text{m}^2$ , and **C)** 1  $\mu\text{m}^2$ .

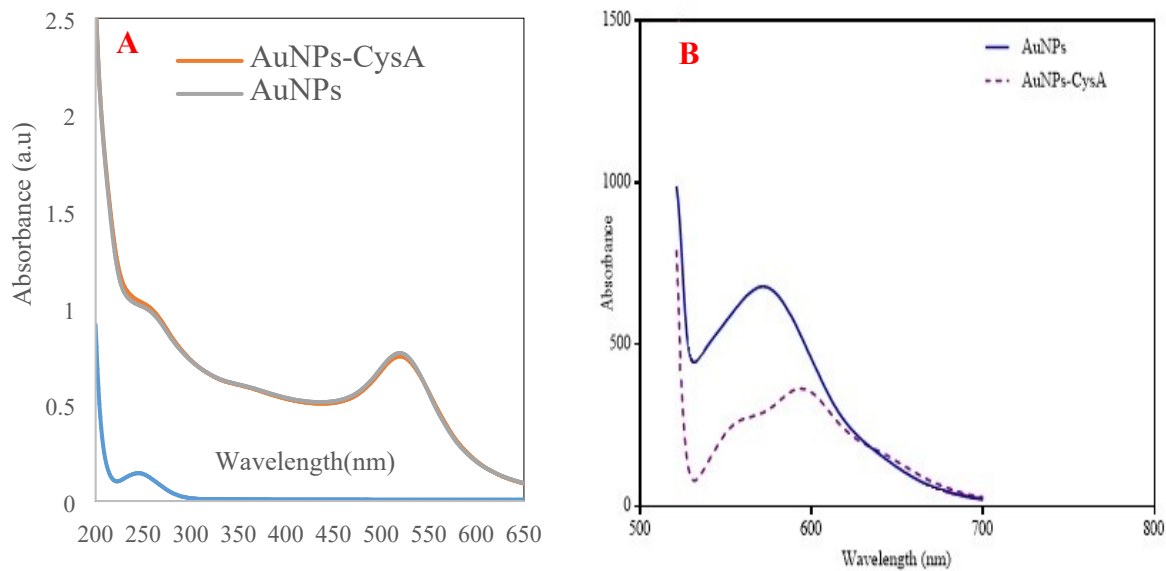

**Fig. S6.** A) Spectrophotometric of AuNPs, AuNPs/CysA, and B) fluorometric spectra of AuNPs, AuNPs/CysA.

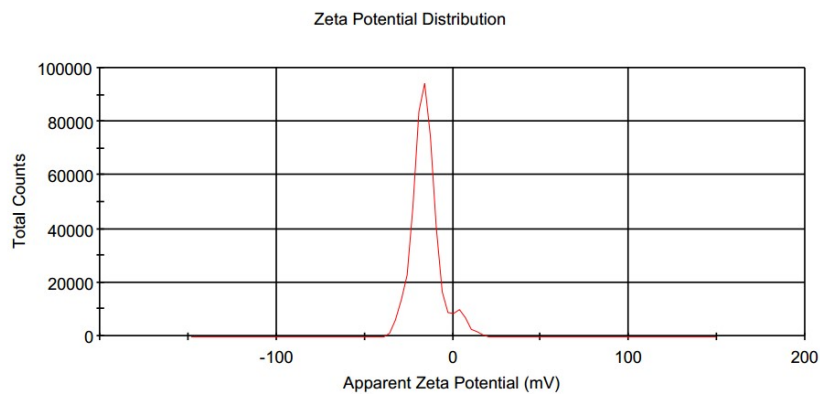

**Fig. S7.** Zeta potential distribution of AuNPs-CysA.

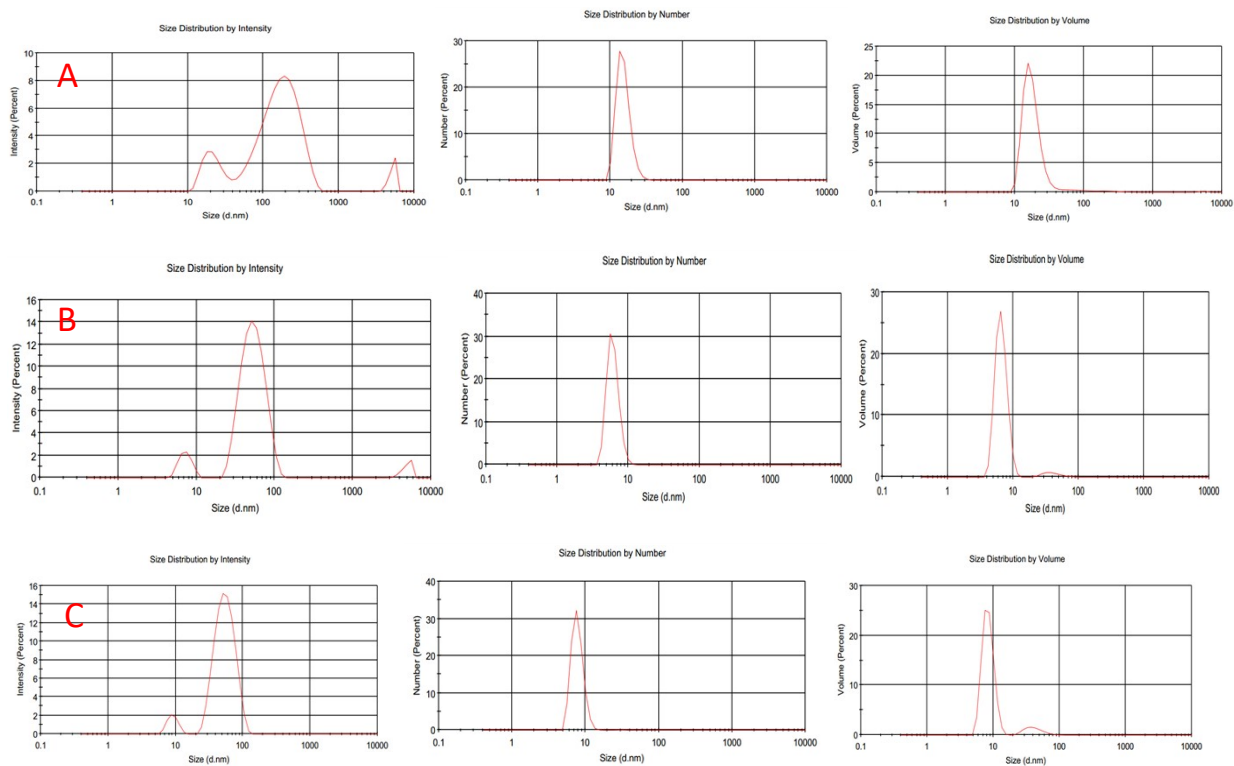

**Fig. S8.** Size distribution of A) AuNPs-CysA, B) AuNPs-CysA after adding RAC (at the first minute), and C) AuNPs-CysA after adding RAC (after 20 minutes) by intensity, number, and volume.

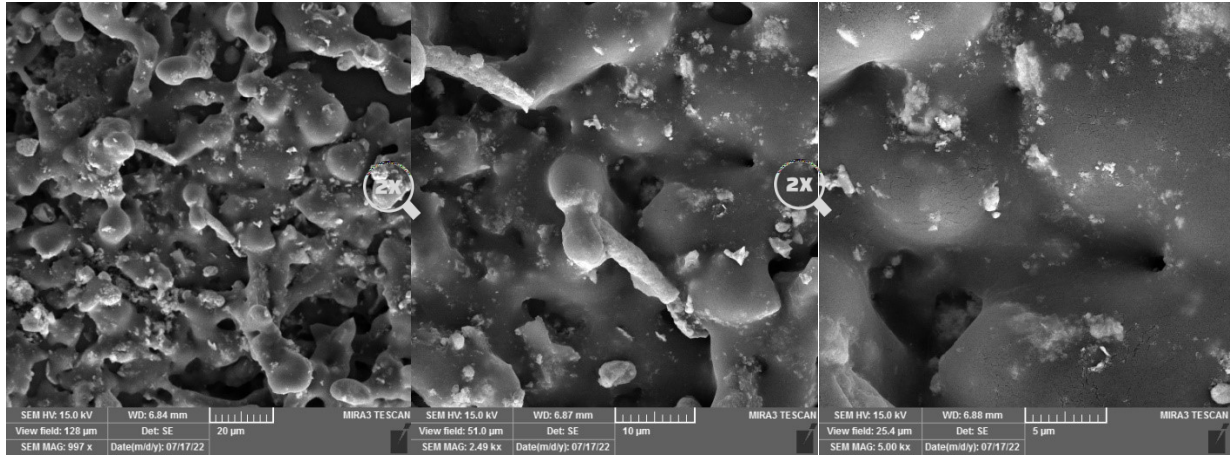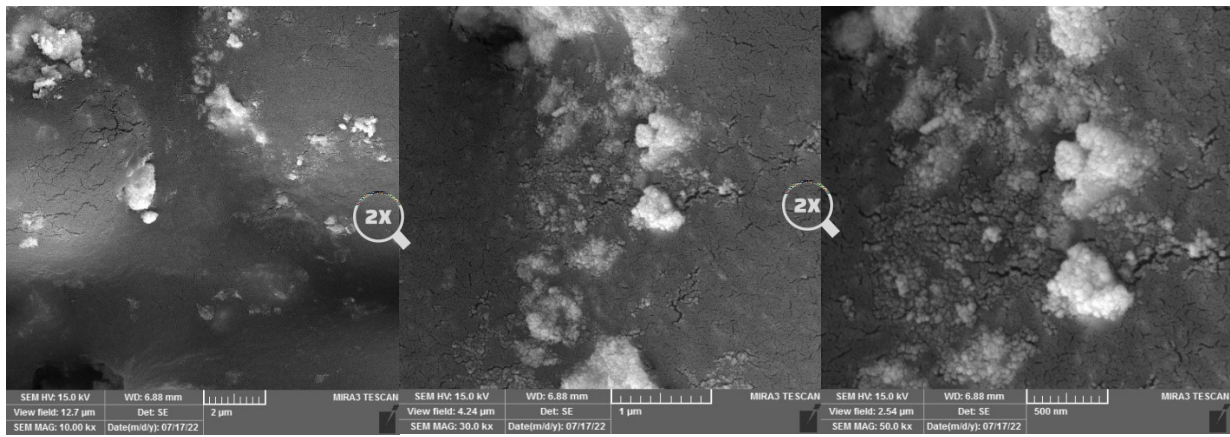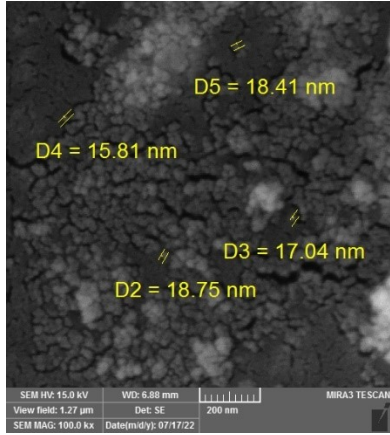



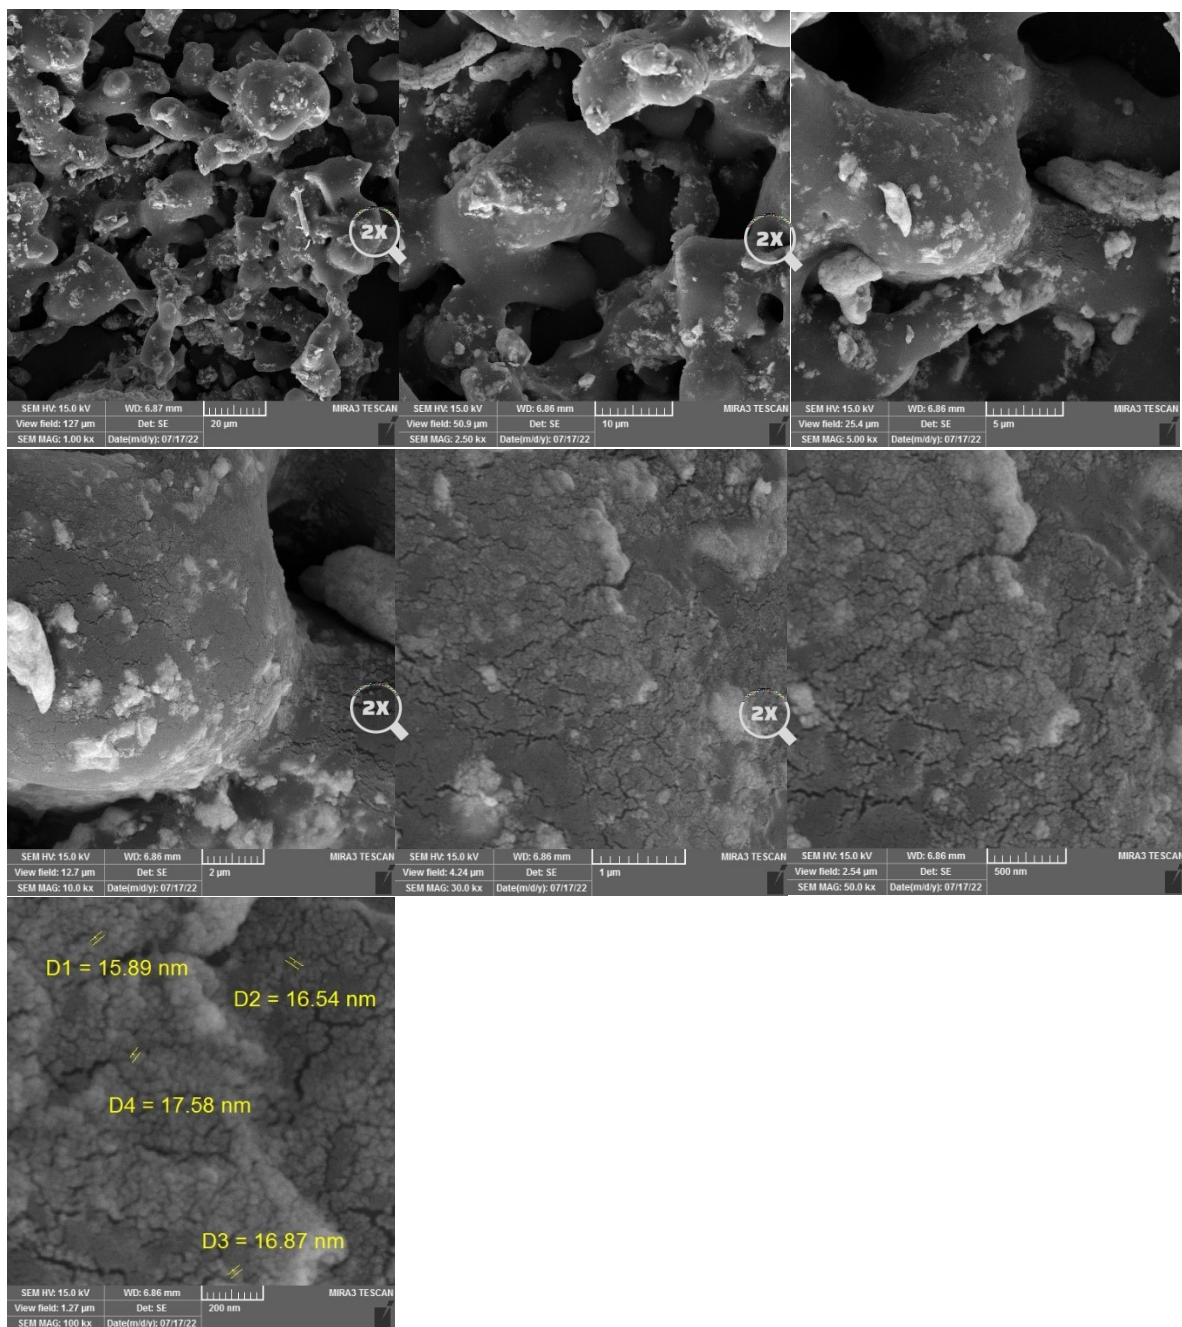

**Fig. S9.** FE-SEM images of AuNPs-CysA from two different places of the sample with various magnitudes.

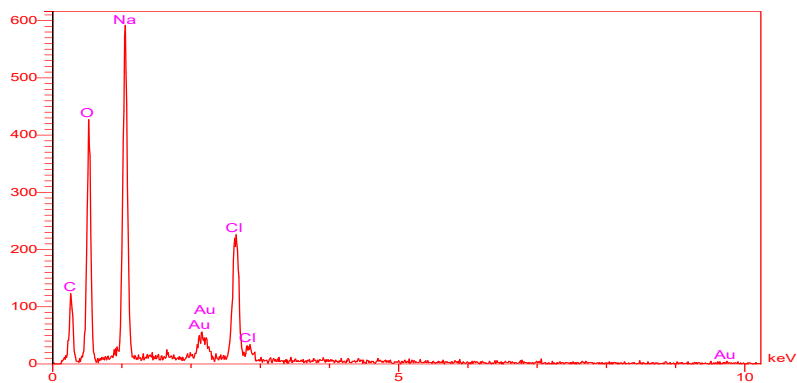

**Fig. S10.** EDAX spectra of AuNPs-DDT.

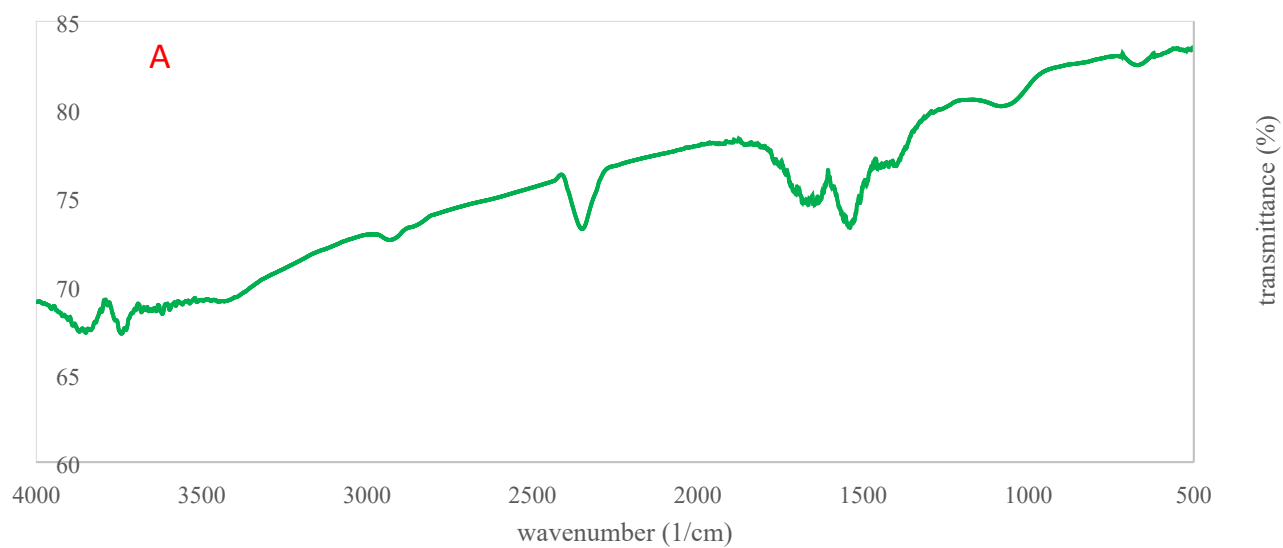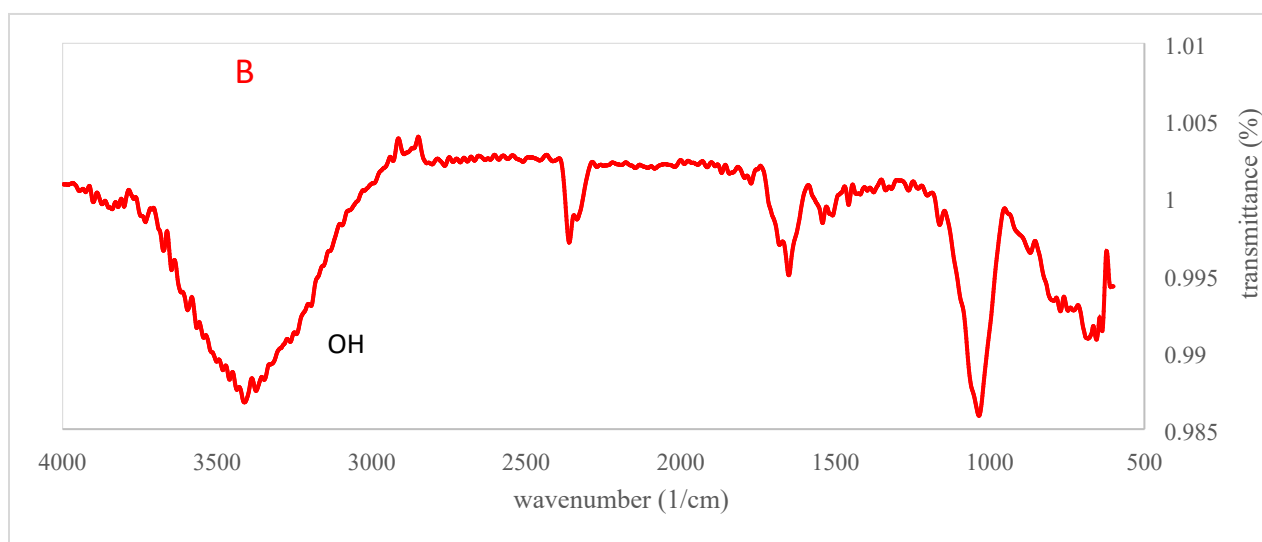

**Fig. S11.** FTIR spectra of (A) AuNPs, and B) AuNPs-DDT.



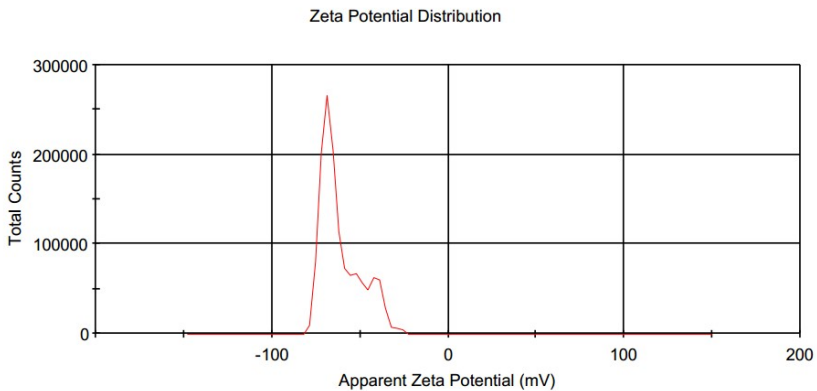

**Fig. S12.** Zeta potential distribution of AuNPs-CysA.

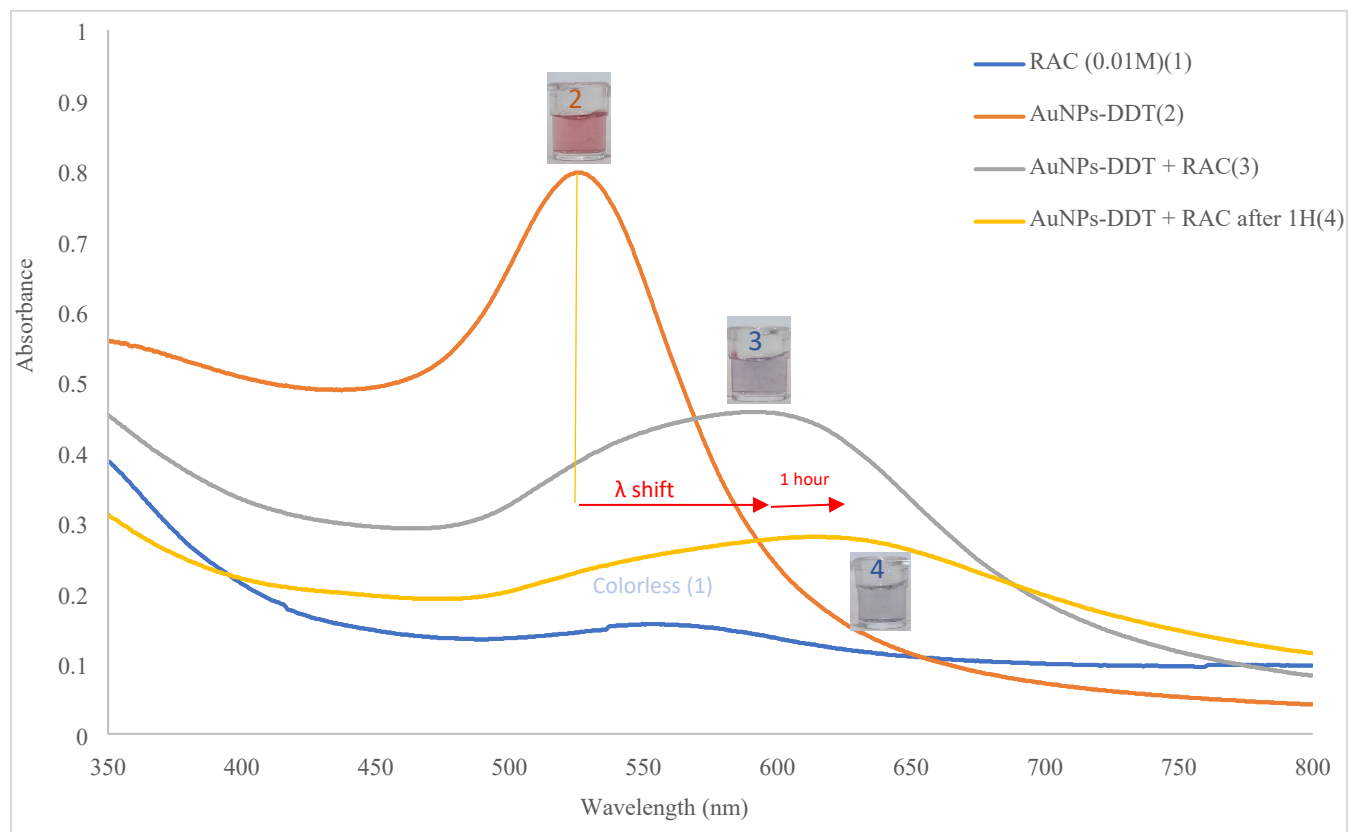

**Fig. S13.** UV-Vis absorption responses for RAC (0.01 M), AuNPs-DDT, AuNPs-DDT + RAC (0.01 M), and AuNPs-DDT + RAC (0.01 M) after an hour.

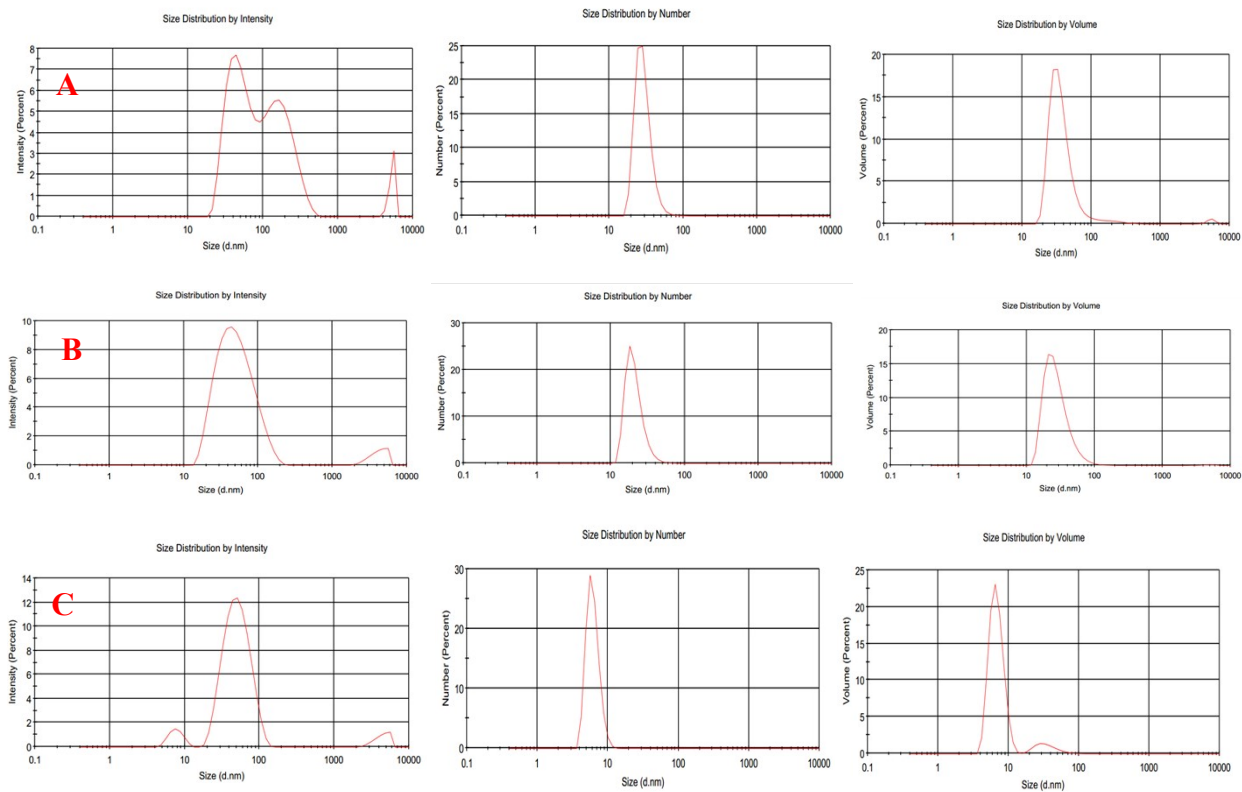

**Fig. S14.** Size distribution of A) AuNPs-DDT, B) AuNPs- DDT after adding RAC (at the first minute), and C) AuNPs- DDT after adding RAC (after 20 minutes) by intensity, number, and volume.

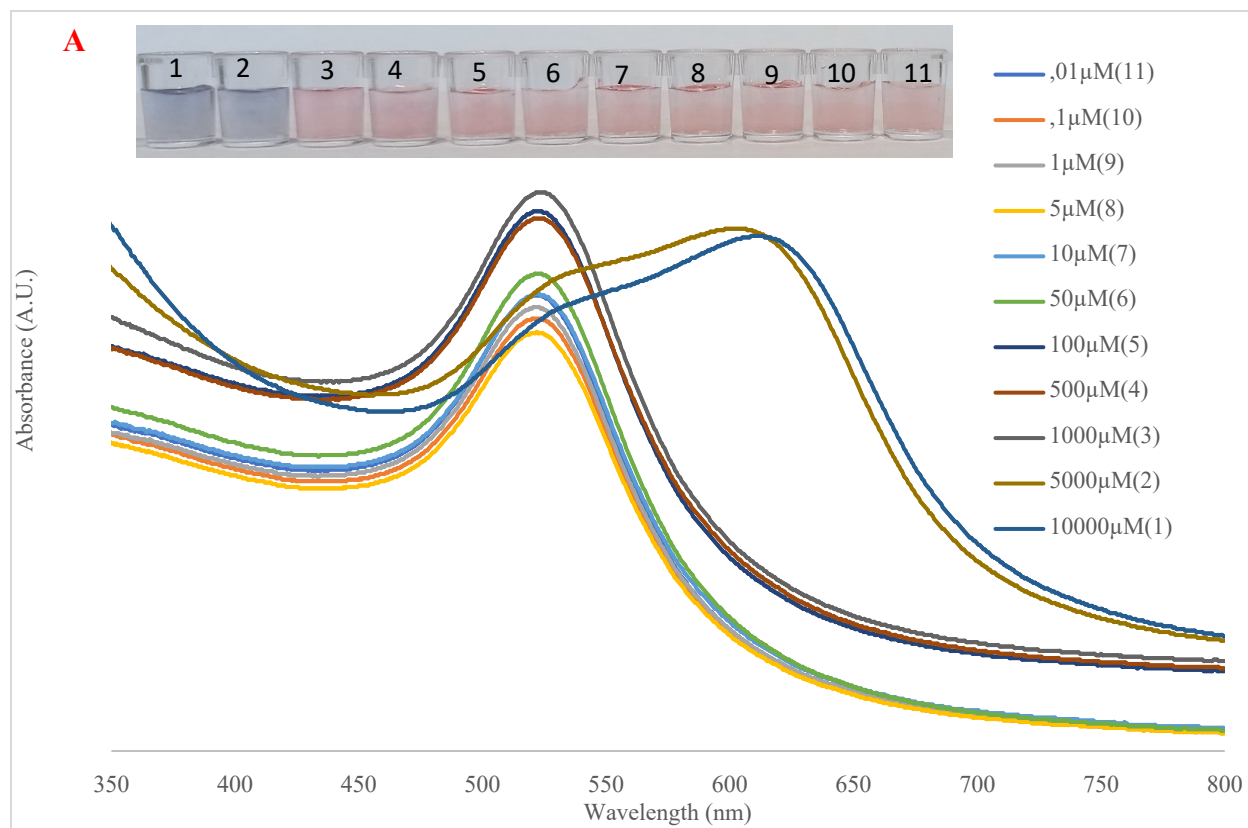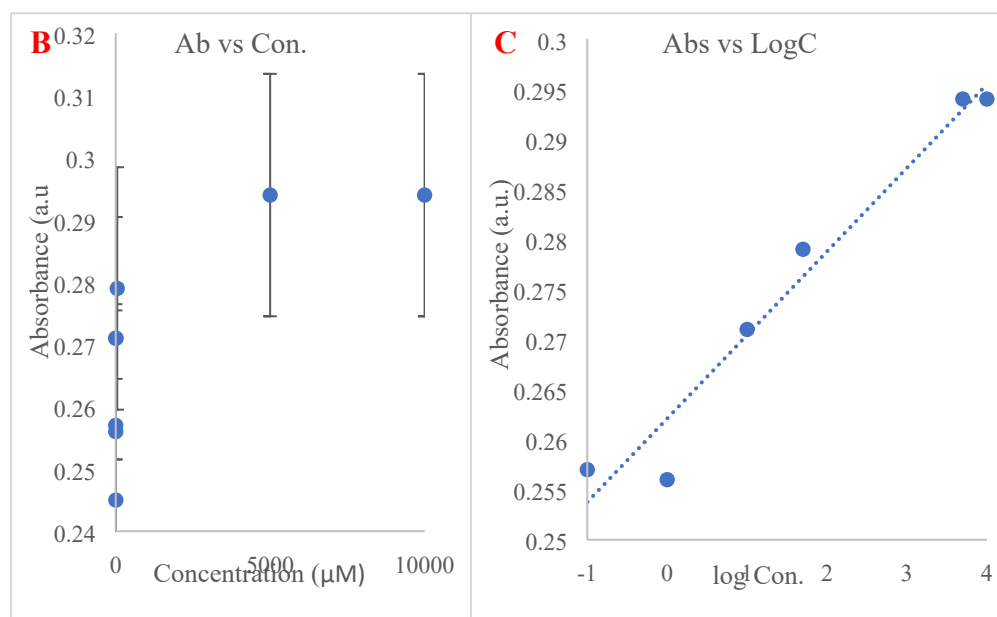

**Fig. S15. A)** UV-Vis of optical probe 1 (AuNPs-CysA) in the presence of various concentrations of RAC (1:1 V/V ratio). Inset: related photographic picture, **B)** Peak intensity versus RAC concentration, **C)** Calibration curve of absorbance versus the logarithm of RAC concentration.

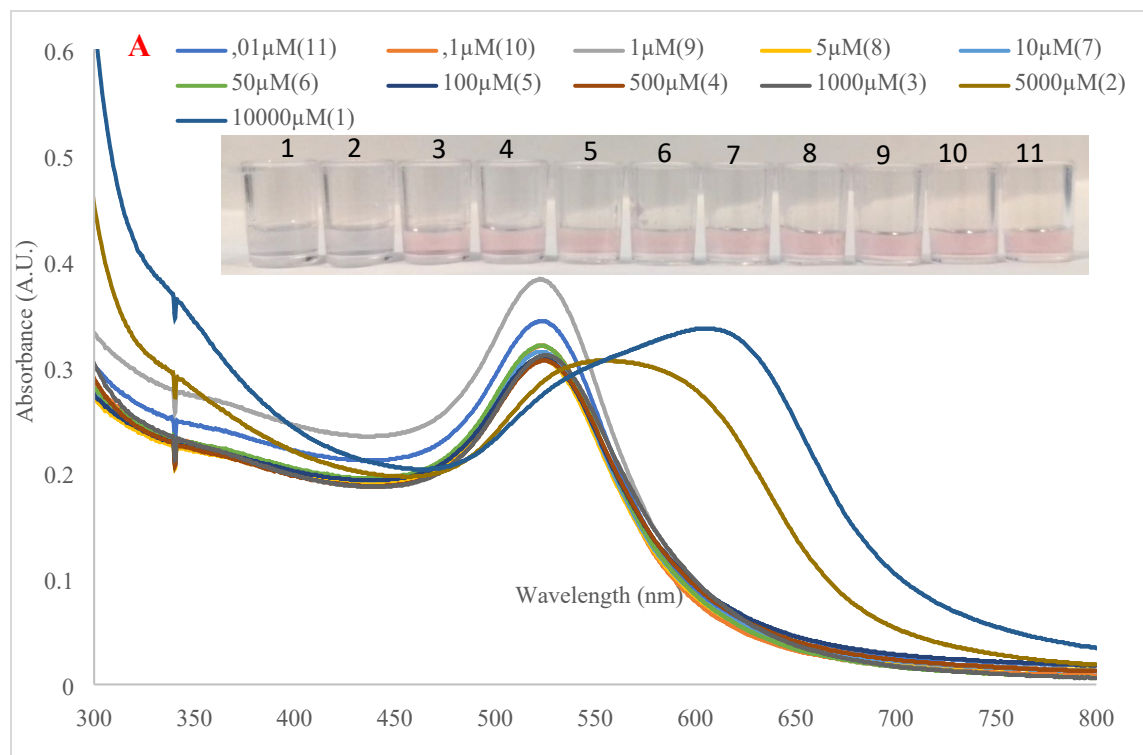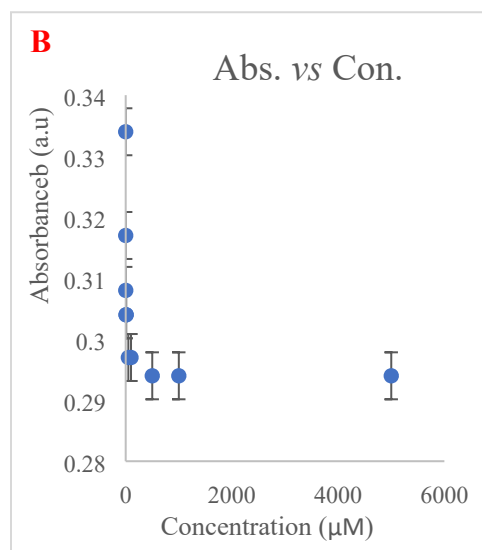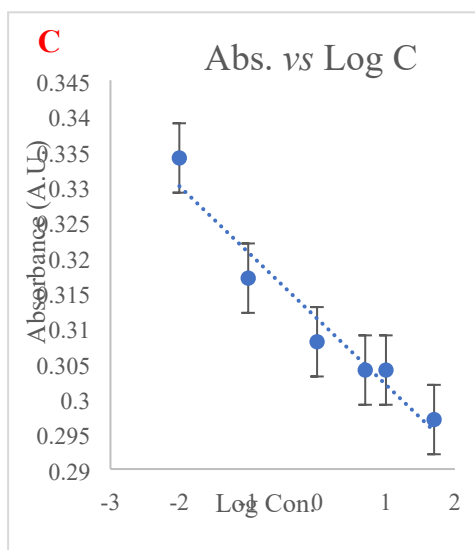

**Fig. S16. A)** UV-Vis of optical probe 2 (AuNPs-DDT) in the presence of various concentrations of RAC (1:1 V/V ratio). Inset: related photographic image, **B)** peak intensity versus RAC concentration, **C)** Calibration curve of absorbance versus the logarithm of RAC concentration.

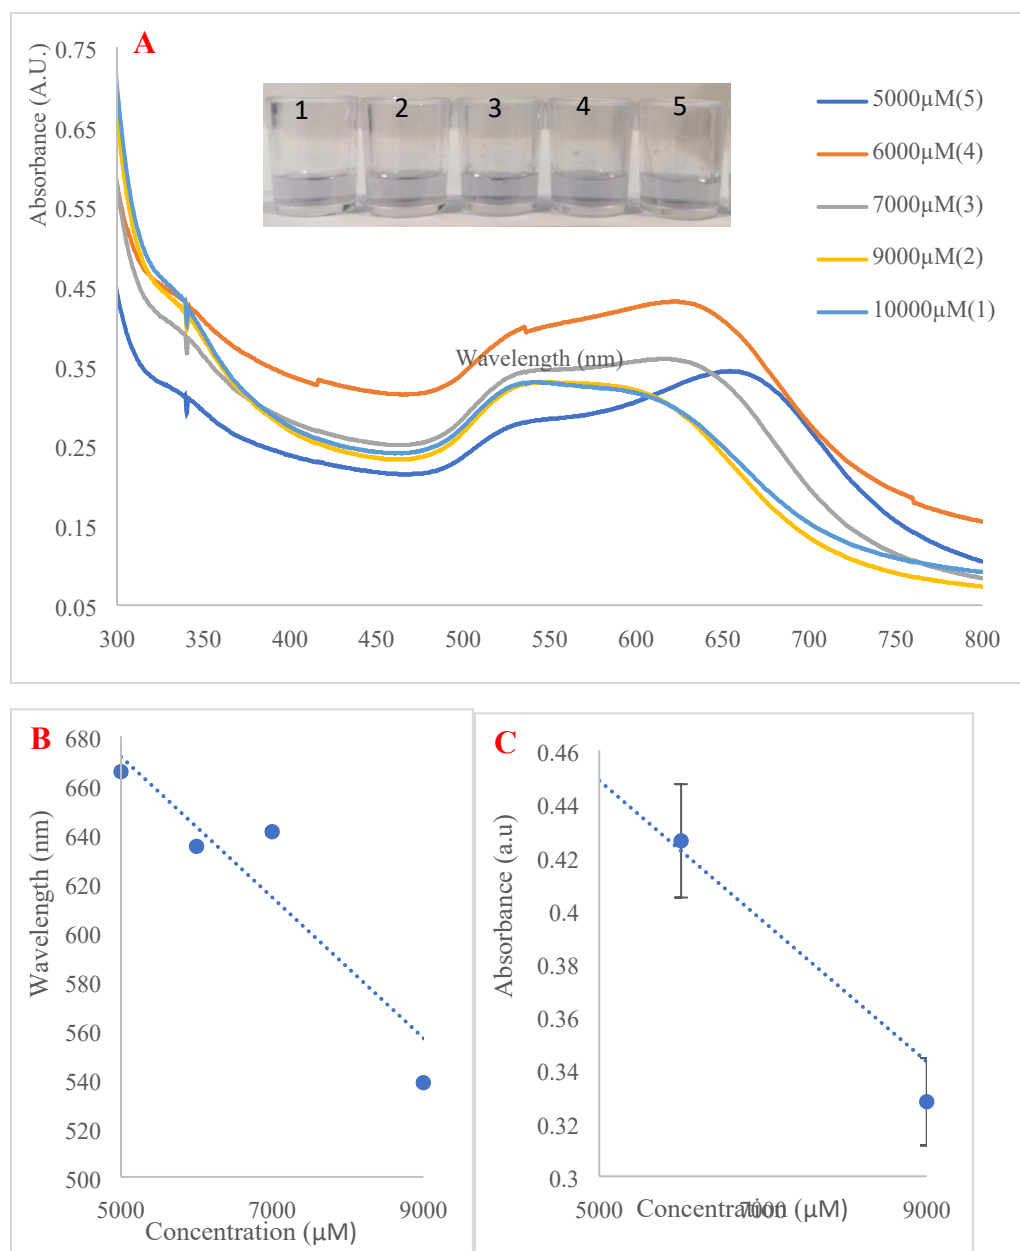

**Fig. S17. A)** UV-Vis of optical probe 2 (AuNPs-DDT) in the presence of various concentrations of RAC. Inset: related photographic image, **B)** Calibration curve of absorption band wavelength versus RAC concentration, **C)** Calibration curve of absorbance versus RAC concentration.

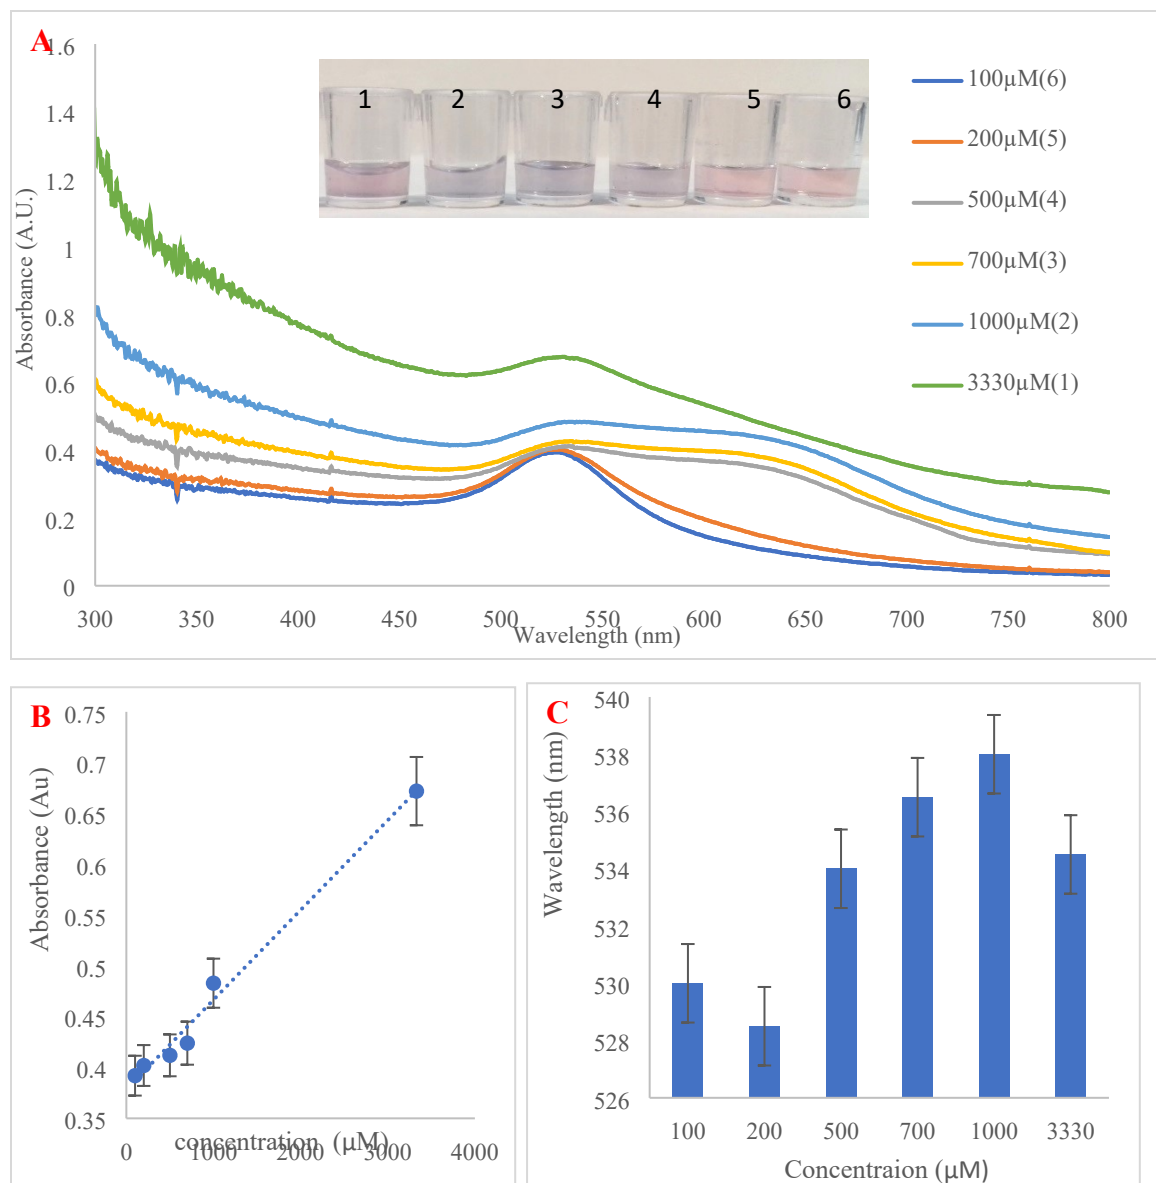

**Fig. S18.** **A)** UV-Vis spectrophotometry of various RAC concentrations spiked in real sample added into AuNPs-CysA with 1:1 V/V ratio. Inset: related colorimetric test, **B)** calibration curve of absorbance versus concentration **C)** Histogram of absorbance band wavelength versus different concentrations.



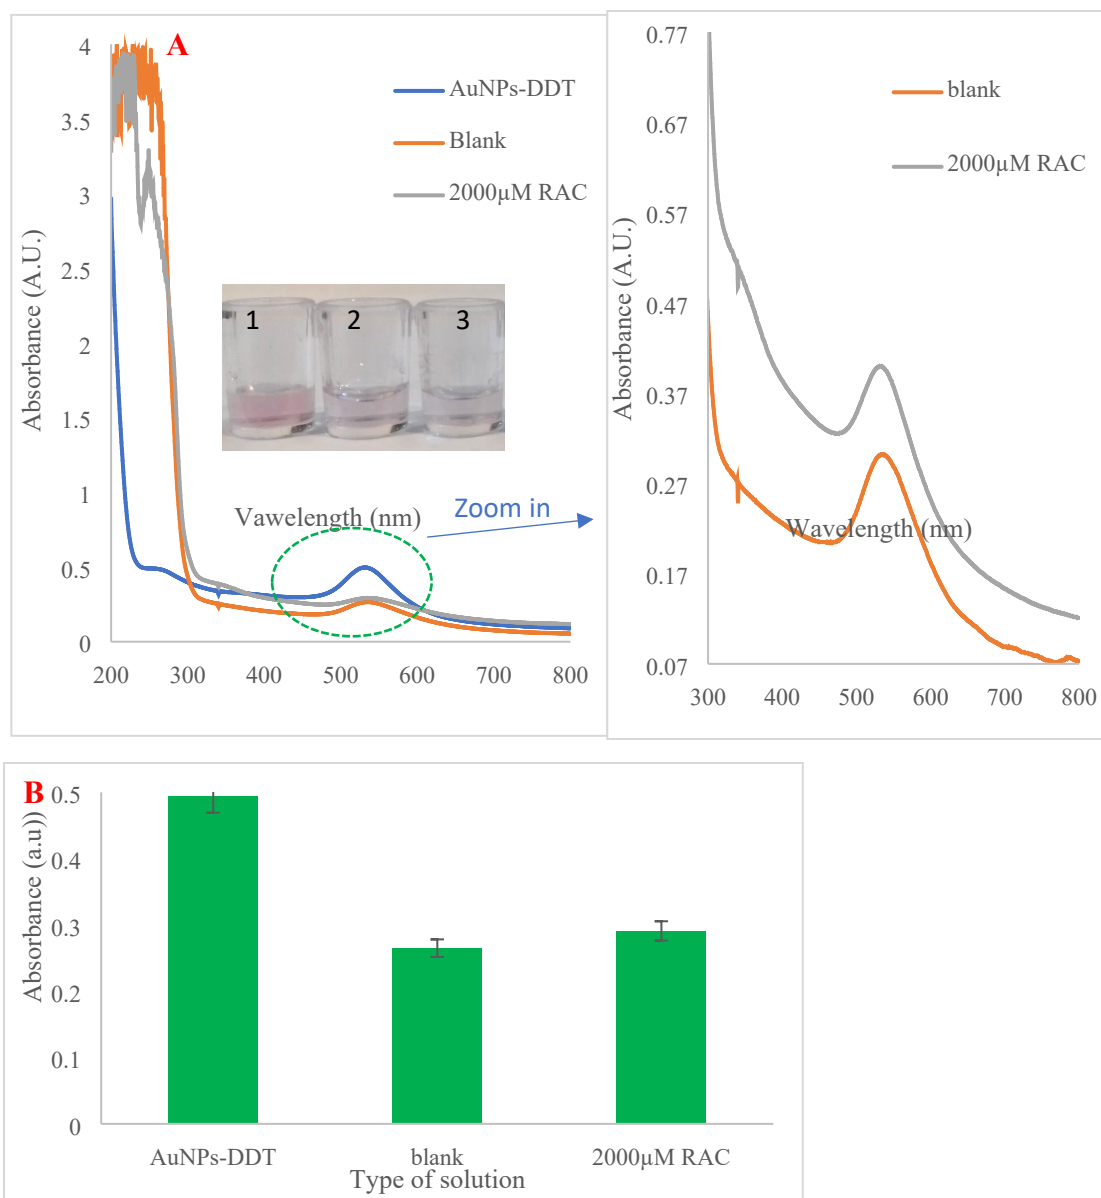

**Fig. S19. A)** UV-Vis spectra of **1.** AuNPs-DDT, **2.** Real sample (Blank)/AuNPs-DDT, and **3.** AuNPs-DDT /RAC 2000 μM spiked in the real sample. Inset: related digital image, **B)** histogram of corresponding absorbance band intensity.

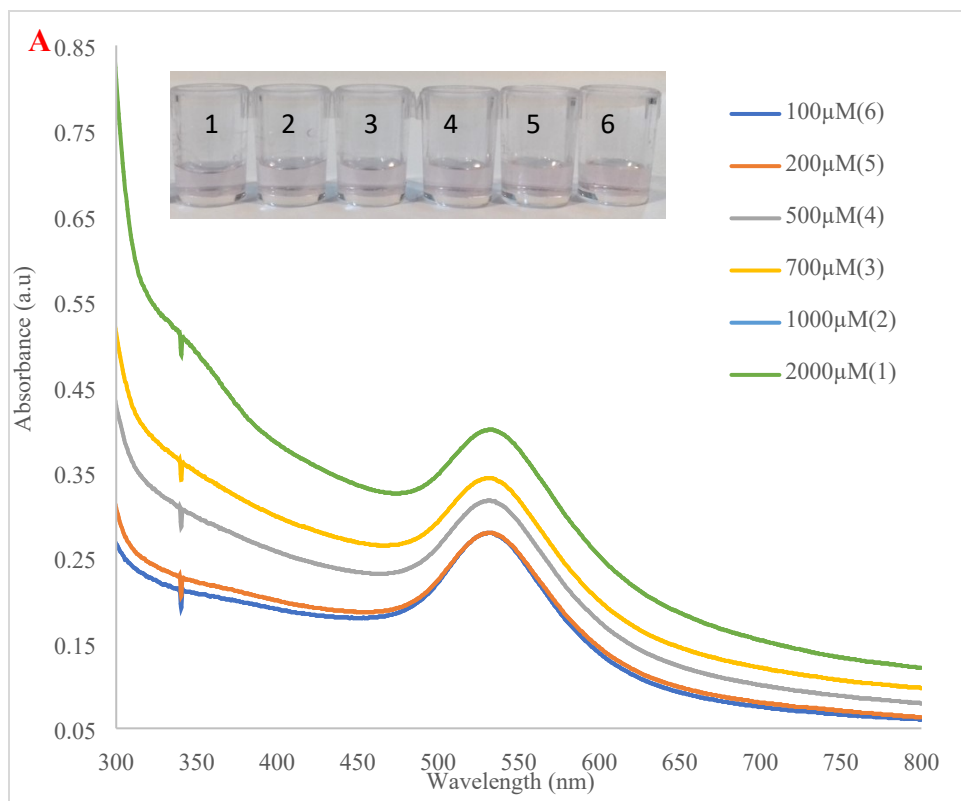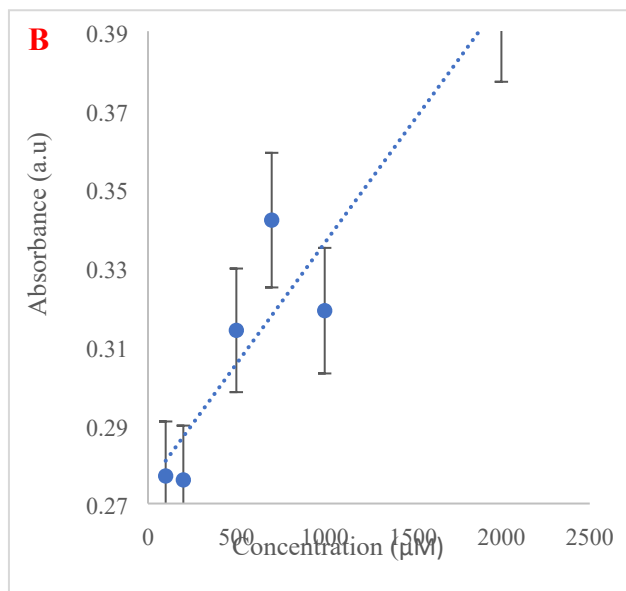

**Fig. S20. A)** UV-Vis spectrophotometry of various RAC concentrations in real sample added into AuNPs-DDT (optical probe) with 1:1 V/V ratio. Inset: related colorimetric test, **B)** Calibration curve of absorbance versus concentration.

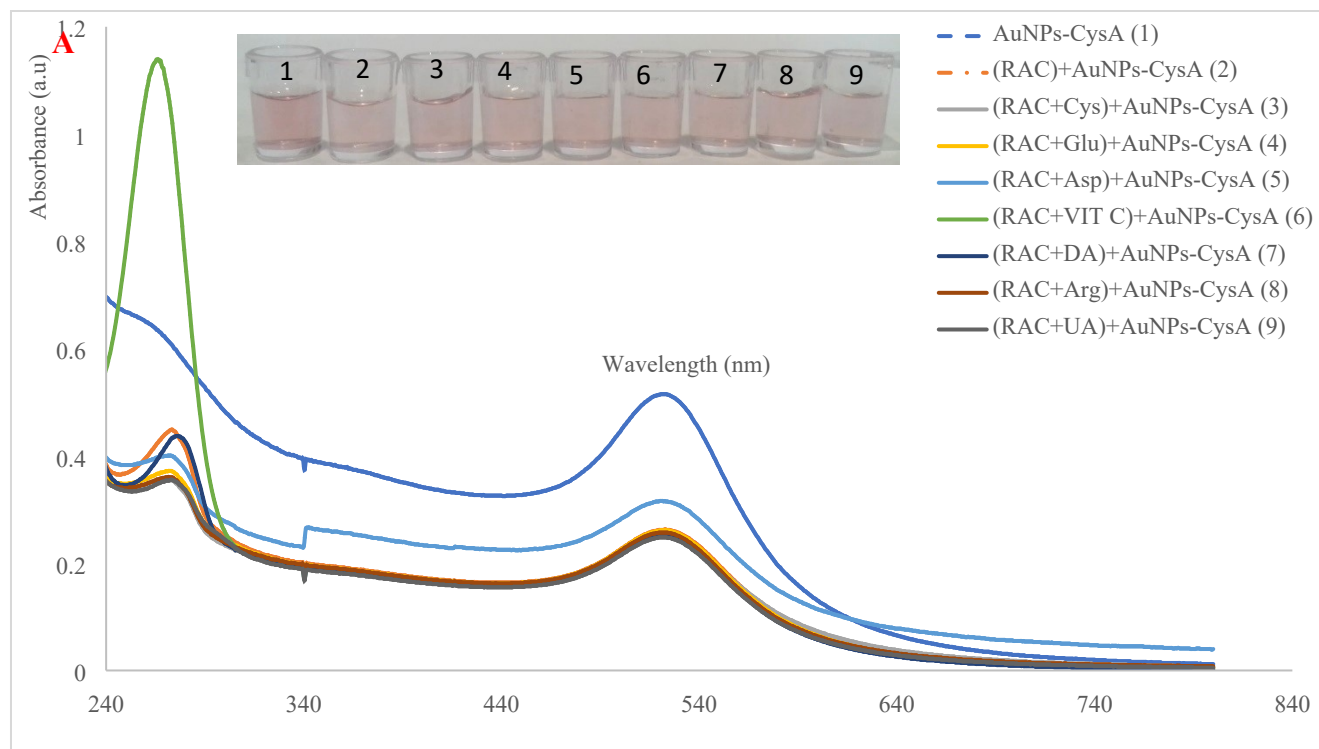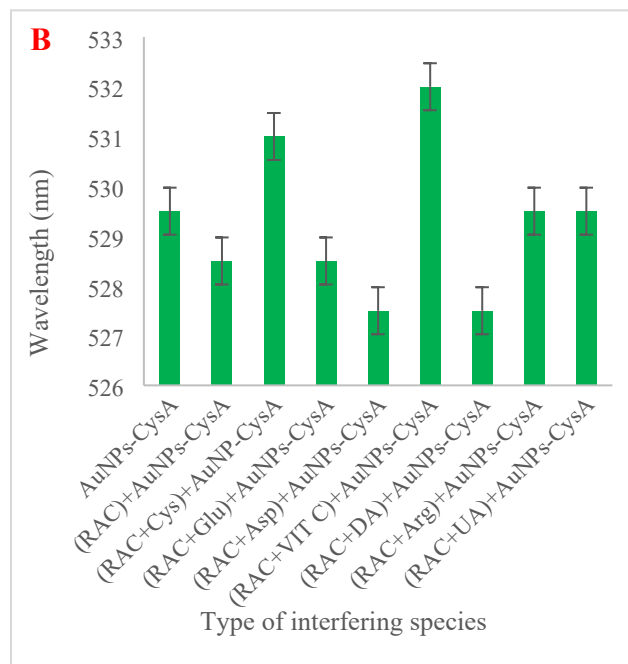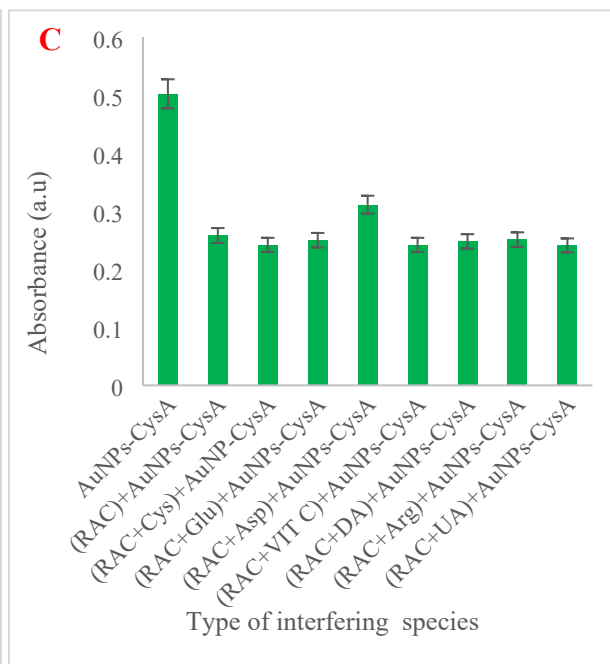

**Fig. S21. A)** The UV-Vis spectrophotometry of **1.** AuNPs-CysA, **2.** AuNPs-CysA/RAC (1:1 V/V ratio), **3.** AuNPs-CysA/(RAC+Cys), **4.** AuNPs-CysA/(RAC+Glu), **5.** AuNPs-CysA/(RAC+Asp), **6.** AuNPs-CysA/(RAC+VIT C), **7.** AuNPs-CysA/(RAC+DA), **8.** AuNPs-CysA/(RAC+Arg), **9.** AuNPs-CysA/(RAC+UA); from No. 3 to No. 9, there were 200  $\mu$ L of each solution, with the ratio of AuNPs-CysA/potential interference + RAC being 1:0.5:0.5 V/V/V, inset: related digital photo; the histograms for comparison of **B)** the Wavelength, and **C)** the strength of the related absorbance bands. The RAC concentration was 0.1 mM, as were any possible interferences.

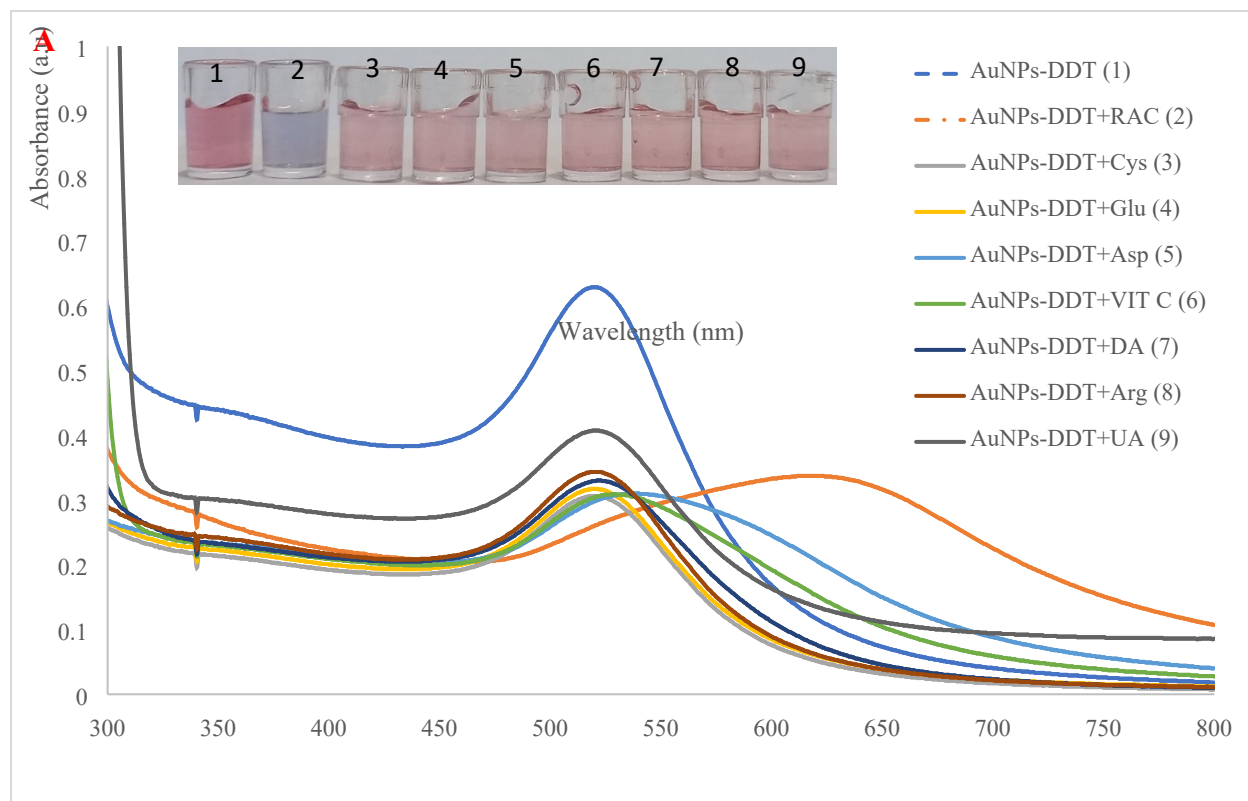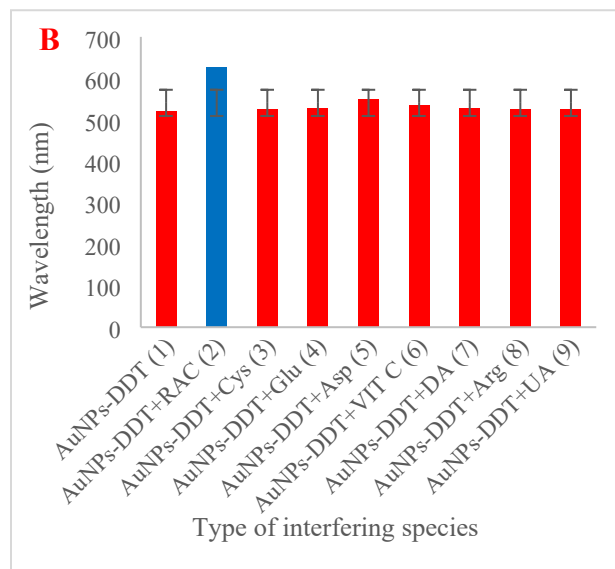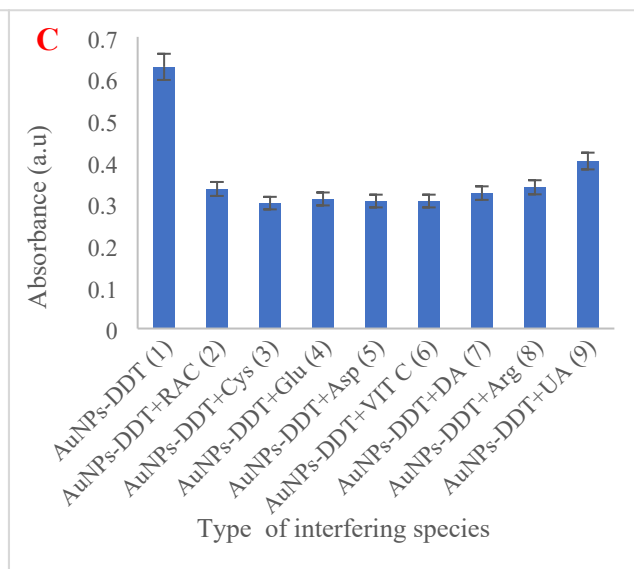

**Fig. S22.** UV-Vis spectroscopy of **1.** AuNPs-DDT, **2.** AuNPs- DDT/RAC, **3.** AuNPs- DDT/Cys, **4.** AuNPs- DDT/Glu, **5.** AuNPs- DDT/Asp, **6.** AuNPs- DDT/ VIT C, **7.** AuNPs- DDT/DA, **8.** AuNPs- DDT/Arg, **9.** AuNPs- DDT/UA. Each cell contained 200  $\mu$ L of the mixture and had a 1:1 V/V ratio of AuNPs- DDT to an analyte. Inset: related digital photo; the histograms for comparison of **B)** the Wavelength, and **C)** the strength of the related absorbance bands. The RAC concentration was 0.005 M, as were any possible interferences.

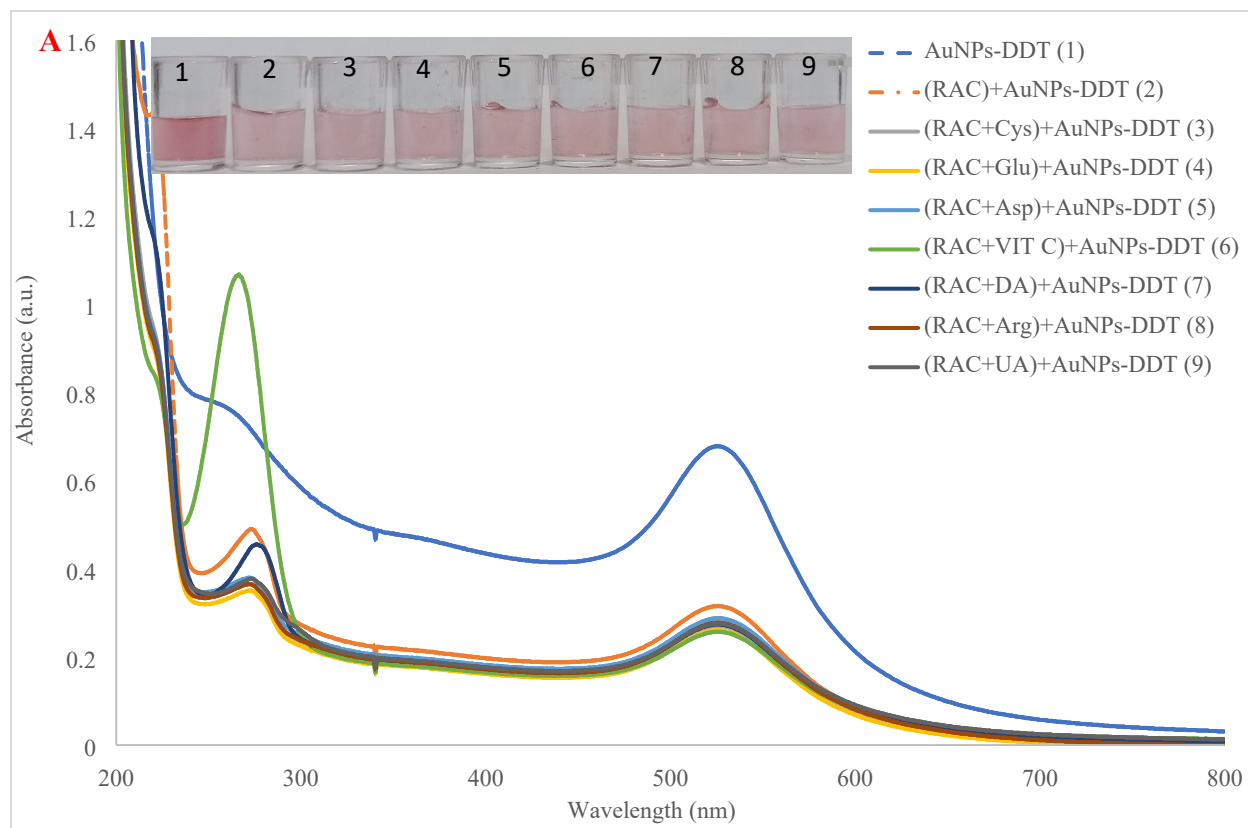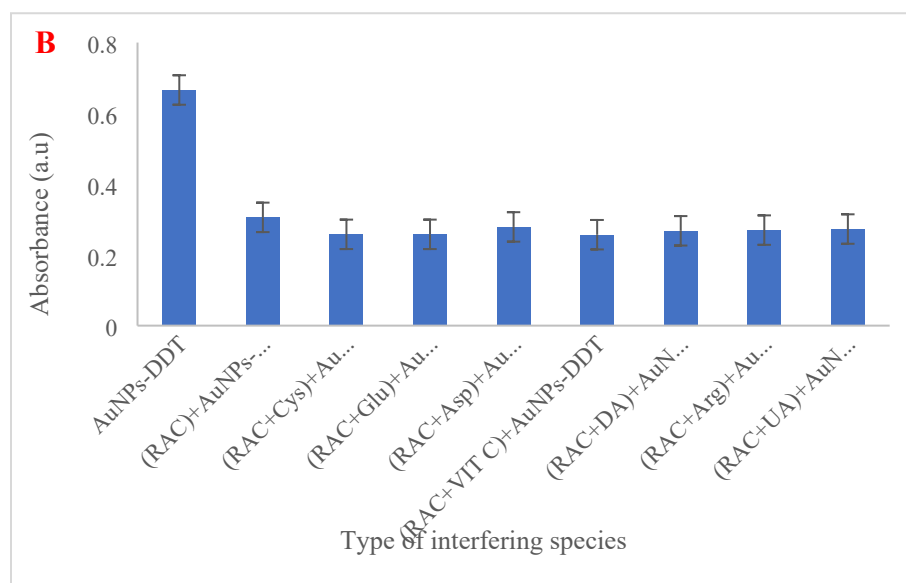

**Fig. S23. A)** The UV-Vis spectrophotometry of **1.** AuNPs-DDT, **2.** AuNPs- DDT/RAC (1:1 V/V ratio), **3.** AuNPs- DDT/(RAC+Cys), **4.** AuNPs- DDT/(RAC+Glu), **5.** AuNPs- DDT/(RAC+Asp), **6.** AuNPs- DDT/(RAC+VIT C), **7.** AuNPs- DDT/(RAC+DA), **8.** AuNPs- DDT/(RAC+Arg), **9.** AuNPs- DDT/(RAC+UA); from No. 3 to No. 9, there were 200  $\mu$ L of each solution, with the ratio of AuNPs-DDT/potential interference + RAC being 1:0.5:0.5 V/V/V, inset: related digital photo; **B)** the histograms for comparison of the related absorbance band strengths. The RAC concentration was 0.1 mM, as were any possible interferences.

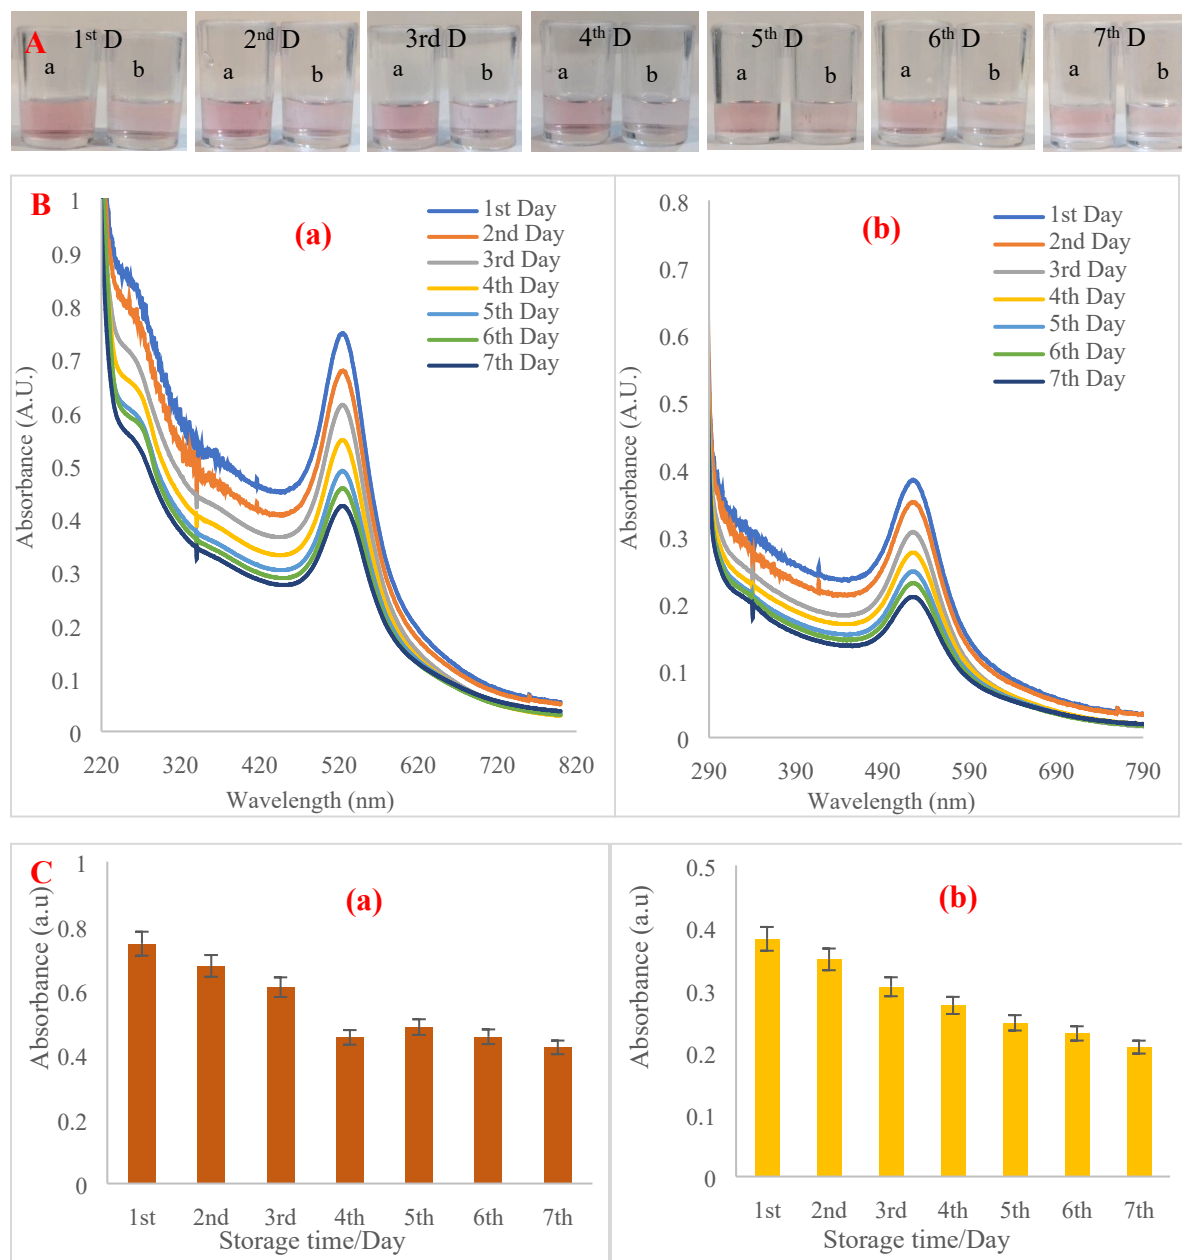

**Fig. S24.** **A)** Daily photographic images of **a) AuNPs-CysA**, **b) AuNPs-CysA/RAC (1000 $\mu$ M)** (1:1 V/V ratio) in a week. **B)** UV-Vis of AuNPs-CysA and AuNPs-CysA/RAC (1000 $\mu$ M) in different storage times (1-7 days). **C)** The related histogram of absorbance band intensity versus storage time.



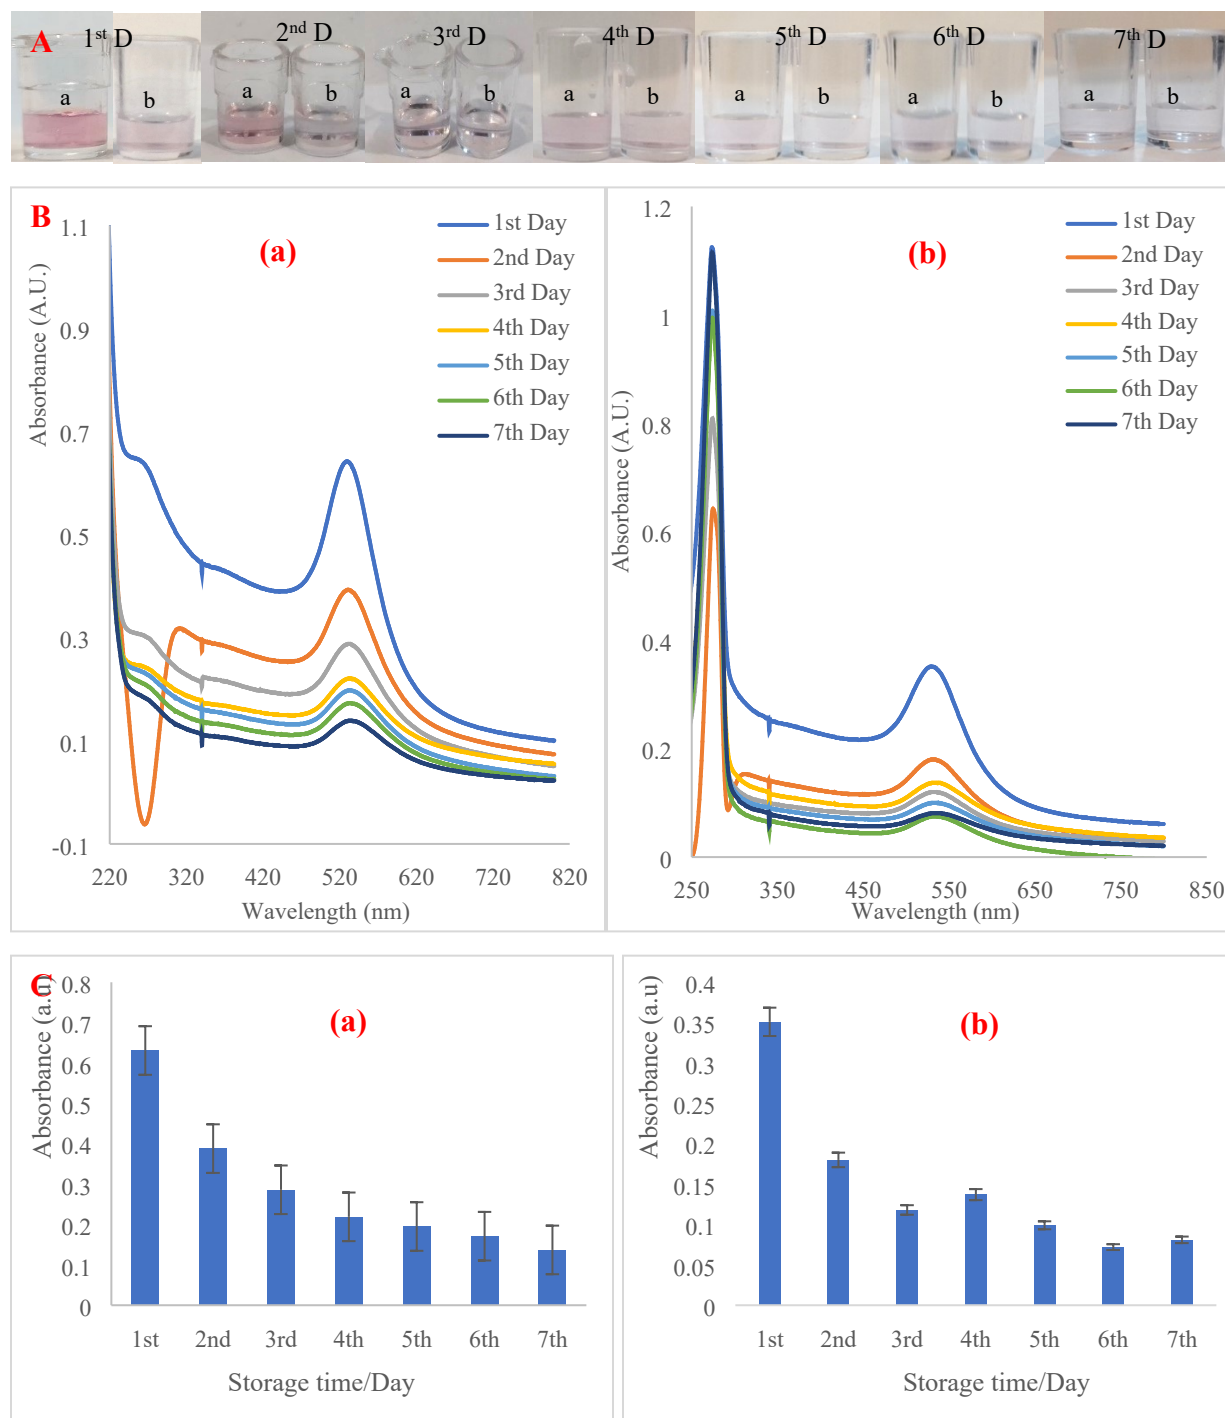

**Fig. S25.** **A)** Daily photographic images of **a)** AuNPs-DDT, **b)** AuNPs-DDT/RAC (5  $\mu$ M) (1:1 V/V ratio) in a week. **B)** UV-Vis of AuNPs-DDT and AuNPs-DDT/RAC (5 $\mu$ M) in different storage times (1-7 days). **C)** The related histogram of absorbance band intensity versus storage time.

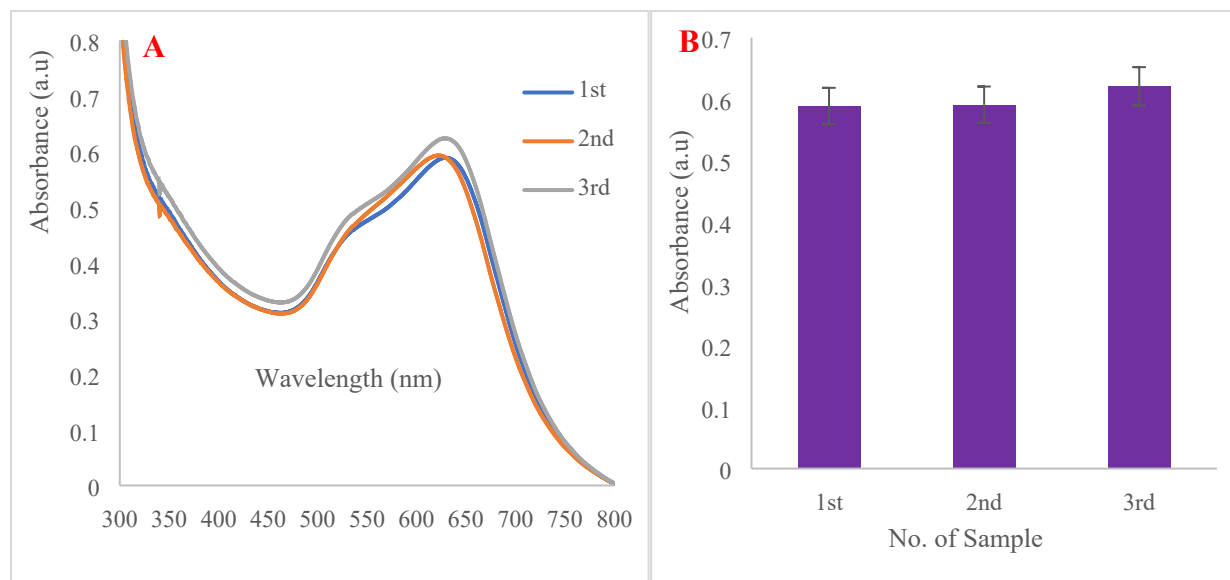

**Fig. S26. A)** UV-Vis of three solutions of AuNPs-CysA/RAC (0.01M) (1:1 V/V ratio) in the constant time of analysis, and **B)** Histogram of absorbance versus the number of samples.

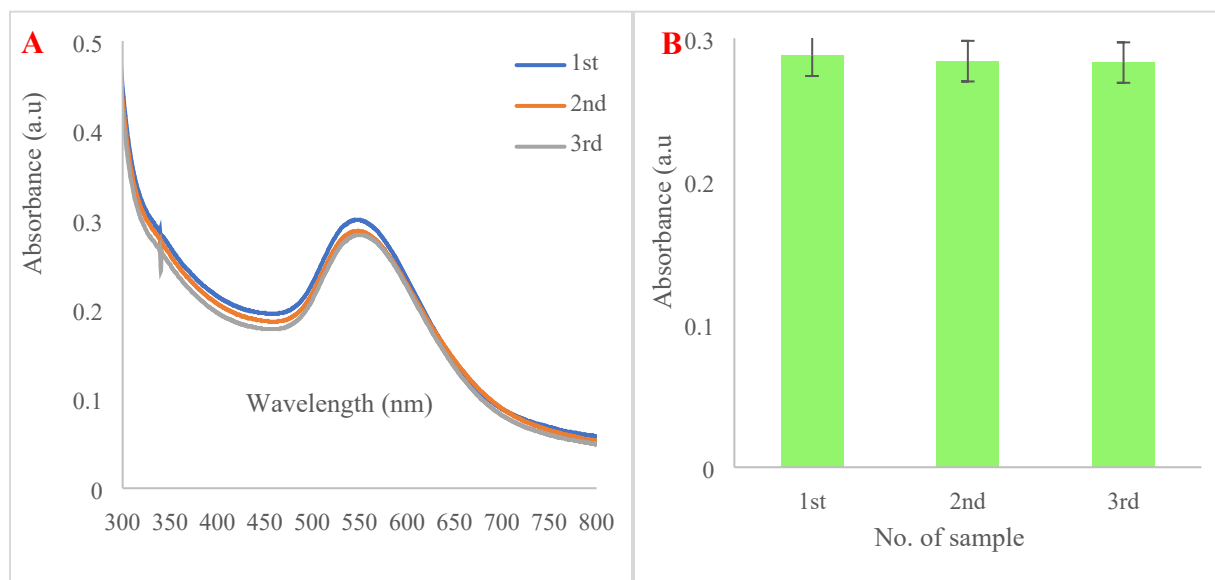

**Fig. S27. A)** UV-Vis of three solutions of AuNPs-DDT/RAC (0.01M) (1:1 V/V ratio) in the constant time of analysis, and **B)** Histogram of absorbance versus the number of samples.

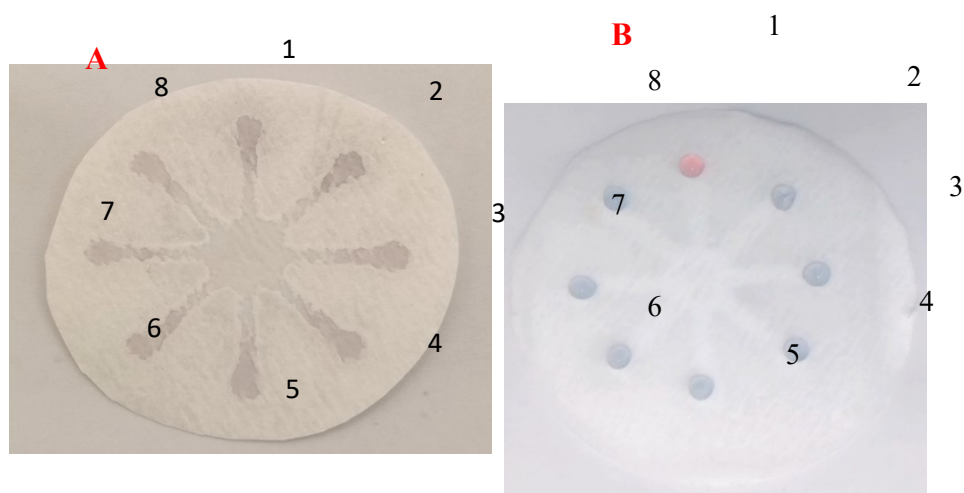

**Fig. S28.** The taken digital photos at the first minute of **A)** Traditional microfluidic fiberglass sheet that had been infused with **1.** AuNPs-CysA/5mM RAC, **2.** AuNPs-CysA/1mM RAC, **3.** AuNPs-CysA/0.1mM RAC, **4.** AuNPs-CysA/0.05mM RAC, **5.** AuNPs-CysA/0.01mM RAC, **6.** AuNPs-CysA/1 $\mu$ M RAC, **7.** AuNPs-CysA/0.1 $\mu$ M RAC, **8.** AuNPs-CysA/0.01 $\mu$ M RAC; **B)** a new type of microfluidic fiberglass sheet with a semi-hydrophobic network infused with **1.** AuNPs-CysA, **2.** AuNPs-CysA/0.01 M RAC, **3.** AuNPs-CysA/0.008 M RAC, **4.** AuNPs-CysA/0.006 M RAC, **5.** AuNPs-CysA/0.005 M RAC, **6.** AuNPs-CysA/0.004 M RAC, **7.** AuNPs-CysA/0.003 M RAC, **8.** AuNPs-CysA/0.002 M RAC. AuNPs-CysA/RAC was combined with a 1:1 V/V ratio and each well contains 10  $\mu$ L of the mixture.

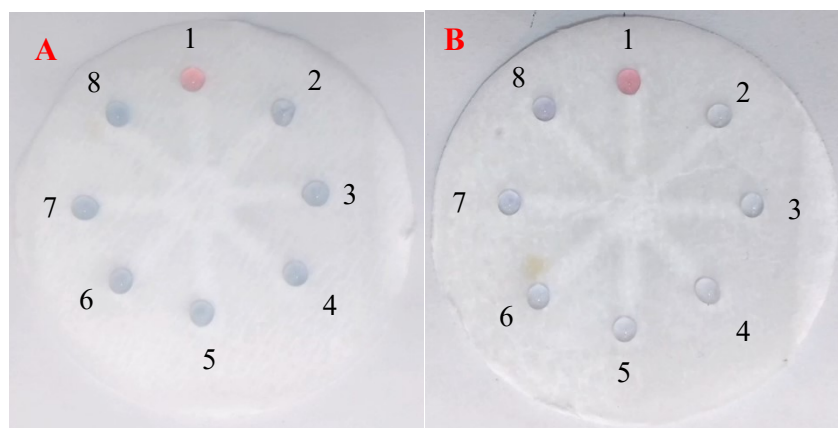

**Fig. S29.** Photographs of modified fiberglass microfluidic sheets with **A)** AuNPs-CysA, and **B)** AuNPs-DDT **1.** Without RAC, and with 5  $\mu$ L RAC concentrations of **2.** 0.01 M, **3.** 0.008 M, **4.** 0.006 M, **5.** 0.005 M, **6.** 0.004 M, **7.** 0.003 M, **8.** 0.002 M (the combination ratio was 1:1 V/V). Each well contains a 10  $\mu$ L mixture.

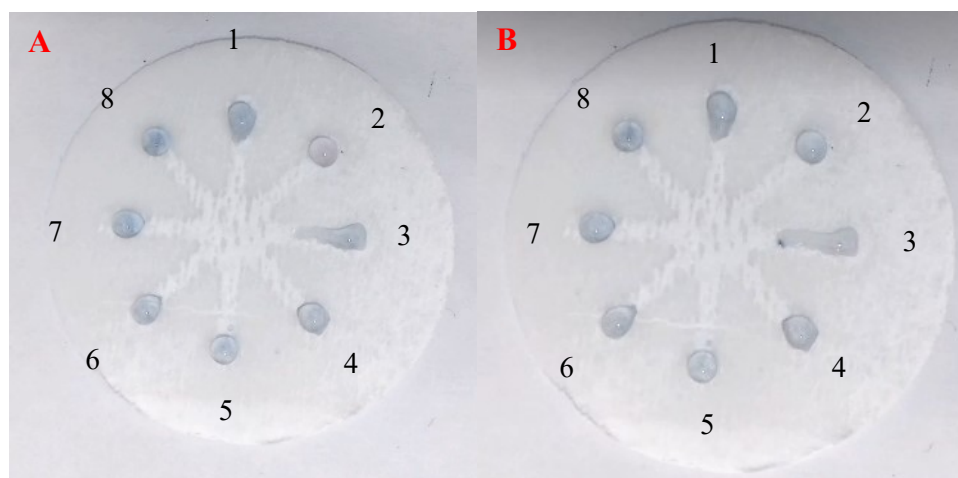

**Fig. S30.** Fiberglass microfluidic sheets' digital images contain: **1.** AuNPs-CysA/RAC 0.01M (1:1) **2.** AuNPs-CysA/RAC/Cys 0.01M (1:0.5:0.5) **3.** AuNPs-CysA/RAC/Glu 0.01M (1:0.5:0.5) **4.** AuNPs-CysA/RAC/Asp 0.01M (1:0.5:0.5) **5.** AuNPs-CysA/RAC/VIT C 0.01M (1:0.5:0.5) **6.** AuNPs-CysA/RAC/DA 0.01M (1:0.5:0.5) **7.** AuNPs-CysA/RAC/Arg 0.01M (1:0.5:0.5) **8.** AuNPs-CysA/RAC/UA 0.01M (1:0.5:0.5) after **A)** 6 min **B)** 10 min.

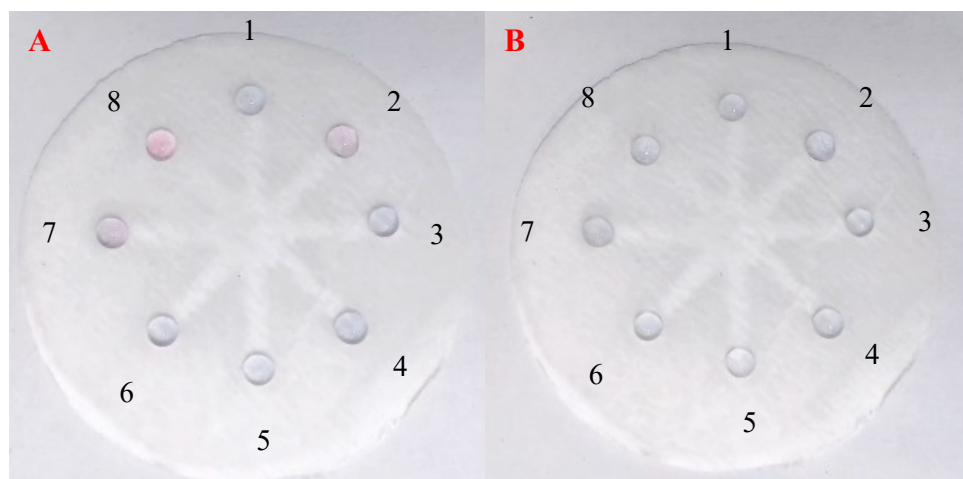

**Fig. S31.** Fiberglass microfluidic sheets' digital images contain **1.** AuNPs-DDT/RAC 0.01M (1:1) **2.** AuNPs-DDT/RAC/Cys 0.01M (1:0.5:0.5) **3.** AuNPs-DDT/RAC/Glu 0.01M (1:0.5:0.5) **4.** AuNPs-DDT/RAC/Asp 0.01M (1:0.5:0.5) **5.** AuNPs-DDT/RAC/VIT C 0.01M (1:0.5:0.5) **6.** AuNPs-DDT/RAC/DA 0.01M (1:0.5:0.5) **7.** AuNPs-DDT/RAC/Arg 0.01M (1:0.5:0.5) **8.** AuNPs-DDT/RAC/UA 0.01M (1:0.5:0.5) after **A)** 6 min, **B)** 15 min.



**Table S1.** The related RGB codes and color names for mentioned items in article

| fig     | item | RGB code      | ~ color name | fig    | item          | RGB code      | ~ color name  | fig    | item          | RGB code      | ~ color name |
|---------|------|---------------|--------------|--------|---------------|---------------|---------------|--------|---------------|---------------|--------------|
| S1      | 1    | 206, 142, 143 | Ruddy Pink   | S16. A | 4             | 210, 184, 180 | Silver Pink   | 3. A   | 6             | 144, 138, 148 | Taupe Gray   |
|         | 2    | 157, 163, 171 | Quick Silver |        | 5             | 207, 177, 178 |               |        | 7             | 182, 145, 148 | Rosy Brown   |
|         | 3    | 202, 201, 196 | Neon Silver  |        | 6             | 208, 180, 178 |               |        | 8             | 191, 150, 148 | Rosy Brown   |
|         | 4    | 204, 205, 199 | Pastel Gray  |        | 7             | 208, 178, 177 |               |        | 9             | 189, 163, 163 | Silver Pink  |
|         | 5    | 195, 132, 140 | Old Rose     |        | 8             | 213, 183, 181 |               | 1      | 174, 146, 142 | Rosy Brown    |              |
|         | 6    | 178, 173, 180 | Dark Gray    |        | 9             | 211, 178, 179 | Pale Chestnut | S21. A | 2             | 181, 163, 160 | Silver Pink  |
|         | 7    | 208, 207, 204 | Neon Silver  |        | 10            | 213, 181, 178 | Silver Pink   |        | 3             | 175, 158, 153 |              |
|         | 8    | 202, 201, 196 |              |        | 11            | 216, 182, 179 | Chilean Pink  |        | 4             | 181, 160, 155 |              |
| S1 (lh) | 1    | 198, 146, 150 | Rosy Brown   | S17. A | 1             | 178, 172, 179 | Dark Gray     |        | 5             | 180, 159, 152 |              |
|         | 2    | 169, 176, 184 | Dark Gray    |        | 2             | 170, 163, 168 | Quick Silver  |        | 6             | 182, 160, 155 |              |
|         | 3    | 203, 207, 206 | Neon Silver  |        | 3             | 158, 156, 162 | Spanish Gray  |        | 7             | 179, 160, 152 |              |
|         | 4    | 193, 197, 196 | Silver       |        | 4             | 157, 155, 161 |               |        | 8             | 178, 161, 157 |              |
|         | 5    | 187, 144, 154 | Rosy Brown   | 5      | 163, 161, 164 | Quick Silver  | 9             |        | 175, 162, 160 |               |              |
|         | 6    | 179, 184, 188 | Medium Gray  | 2. A   | 1             | 202, 156, 157 | Rosy Brown    | S22. A | 1             | 166, 114, 127 | Turkish Rose |
|         | 7    | 197, 198, 200 | Neon Silver  |        | 2             | 192, 170, 175 | Silver Pink   |        | 2             | 145, 146, 164 | Manatee      |
|         | 8    | 194, 198, 199 | Silver       |        | 3             | 178, 172, 179 | Dark Gray     |        | 3             | 182, 151, 154 | Rosy Brown   |
| 1       | 2    | 180, 128, 130 | Old Rose     |        | S18. A        | 1             | 193, 164, 171 |        | Silver Pink   | 4             |              |
|         | 3    | 142, 146, 158 | Manatee      | 2      |               | 178, 172, 179 | Dark Gray     |        | 5             | 179, 147, 150 |              |
|         | 4    | 149, 148, 154 | Spanish Gray | 3      |               | 179, 171, 179 |               |        | 6             | 183, 149, 150 |              |
| S13     | 2    | 179, 122, 128 | Old Rose     | 4      |               | 186, 176, 181 | Silver Pink   |        | 7             | 182, 146, 147 |              |
|         | 3    | 160, 151, 162 | Rose quartz  | 5      |               | 219, 187, 184 | Chilean Pink  |        | 8             | 187, 153, 152 |              |
|         | 4    | 160, 159, 167 | Quick Silver | 6      |               | 217, 189, 189 |               |        | 9             | 183, 150, 151 |              |
| S15. A  | 1    | 145, 151, 167 | Manatee      | S19. A | 1             | 180, 152, 158 | Lilac Luster  | S23. A | 1             | 169, 113, 122 | Turkish Rose |
|         | 2    | 147, 154, 170 |              |        | 2             | 175, 167, 169 | Dark Gray     |        | 2             | 177, 151, 154 | Rosy Brown   |
|         | 3    | 185, 160, 169 | Lilac Luster |        | 3             | 171, 164, 169 | Quick Silver  |        | 3             | 176, 150, 153 |              |
|         | 4    | 186, 158, 162 | Silver Pink  | S20. A | 1             | 177, 170, 175 | Dark Gray     |        | 4             | 178, 152, 154 |              |
|         | 5    | 187, 157, 159 |              |        | 2             | 175, 168, 172 |               |        | 5             | 177, 148, 150 |              |
|         | 6    | 188, 158, 160 |              |        | 3             | 179, 171, 179 |               |        | 6             | 178, 148, 148 |              |
|         | 7    | 193, 163, 163 |              |        | 4             | 179, 173, 180 |               |        | 7             | 178, 148, 148 |              |
|         | 8    | 192, 162, 161 |              |        | 5             | 181, 172, 178 | 8             |        | 176, 147, 149 |               |              |
|         | 9    | 191, 161, 159 |              |        | 6             | 186, 174, 178 | Silver Pink   |        | 9             | 174, 144, 146 |              |
|         | 10   | 192, 161, 161 |              | 3. A   | 1             | 180, 121, 125 | Old Rose      | S24. A | 1st, a        | 182, 141, 139 | Rosy Brown   |
|         | 11   | 190, 161, 158 | 2            |        | 144, 142, 153 | Manatee       | 1st, b        |        | 184, 161, 160 | Silver Pink   |              |
| S16. A  | 1    | 199, 193, 190 | Pale Silver  |        | 3             | 183, 152, 156 | Rosy Brown    |        | 2nd, a        | 189, 149, 157 | Rosy Brown   |
|         | 2    | 195, 188, 188 |              | 4      | 186, 151, 152 | 2nd, b        |               |        | 194, 179, 188 | Silver Pink   |              |
|         | 3    | 212, 180, 178 | Silver Pink  | 5      | 147, 149, 158 | Manatee       | 3rd, a        |        | 181, 147, 156 | Rosy Brown    |              |



| fig    | item          | RGB code      | ~ color name     | fig        | item          | RGB code         | ~ color name     | fig              | item          | RGB code      | ~ color name     |                  |
|--------|---------------|---------------|------------------|------------|---------------|------------------|------------------|------------------|---------------|---------------|------------------|------------------|
| S24.A  | 3rd, b        | 185, 172, 182 | Silver Pink      | S29. B     | 6             | 192, 196, 208    | Lavender Gray    | S30. B           | 2             | 170, 180, 192 | Cadet Gray       |                  |
|        | 4th, a        | 173, 145, 149 | Rosy Brown       |            | 7             | 181, 188, 203    |                  |                  | 3             | 179, 184, 193 | Medium Gray      |                  |
|        | 4th, b        | 172, 166, 170 | Dark Gray        |            | 8             | 179, 180, 196    |                  |                  | 4             | 189, 193, 202 | Lavender Gray    |                  |
|        | 5th, a        | 185, 151, 147 | Rosy Brown       | 4. A       | 1             | 163, 176, 194    | Cadet Gray       |                  | 5             | 177, 184, 193 | Medium Gray      |                  |
|        | 5th, b        | 188, 166, 161 | Silver Pink      |            | 2             | 217, 187, 204    | Thistle          |                  | 6             | 182, 187, 196 | Lavender Gray    |                  |
|        | 6th, a        | 193, 160, 156 |                  |            | 3             | 237, 188, 192    | Baby Pink        |                  | 7             | 174, 183, 196 | Light Steel Blue |                  |
|        | 6th, b        | 194, 176, 172 |                  |            | 4             | 201, 177, 191    | Thistle          |                  | 8             | 136, 147, 166 | Manatee          |                  |
|        | 7th, a        | 196, 167, 168 |                  |            | 5             | 194, 195, 207    | Lavender Gray    |                  | 5. A          | 1             | 183, 191, 206    | Lavender Gray    |
| 7th, b | 201, 179, 180 | 6             |                  |            | 178, 192, 217 | Light Steel Blue | 2                | 229, 201, 215    |               | Queen Pink    |                  |                  |
| S25. A | 1st, a        | 198, 155, 163 |                  |            | Rosy Brown    | 7                | 207, 190, 207    | Languid Lavender |               |               | 3                | 230, 198, 210    |
|        | 1st, b        | 205, 187, 188 |                  |            | Silver Pink   | 8                | 237, 199, 204    | Baby Pink        |               | 4             | 213, 180, 195    | Queen Pink       |
|        | 2nd, a        | 166, 136, 140 |                  | Rosy Brown | 4. B          | 1                | 154, 169, 186    | Cadet Gray       |               | 5             | 238, 201, 214    |                  |
|        | 2nd, b        | 158, 152, 154 | Spanish Gray     | 2          |               | 182, 173, 186    | Lavender Gray    | 6                |               | 200, 201, 214 | Lavender Gray    |                  |
|        | 3rd, a        | 179, 162, 162 | Silver Pink      | 3          |               | 228, 179, 182    | Pale Chestnut    | 7                |               | 233, 201, 213 | Queen Pink       |                  |
|        | 3rd, b        | 176, 164, 165 |                  | 4          |               | 174, 161, 175    | Rose quartz      | 8                |               | 223, 185, 196 | Cameo Pink       |                  |
|        | 4th, a        | 189, 172, 176 | Pale Silver      | 5          |               | 172, 178, 194    | Lavender Gray    | 5. B             | 1             | 186, 193, 202 | Silver           |                  |
|        | 4th, b        | 198, 186, 184 | Lavender Gray    | 6          |               | 154, 168, 194    | Cadet Gray       |                  | 2             | 211, 178, 191 | Thistle          |                  |
|        | 5th, a        | 212, 201, 207 | Light Gray       | 7          |               | 177, 170, 185    | Rose quartz      |                  | 3             | 217, 190, 201 | Queen Pink       |                  |
|        | 5th, b        | 213, 212, 213 | Lavender Gray    | 8          |               | 221, 175, 177    | Pale Chestnut    |                  | 4             | 197, 183, 194 | Languid Lavender |                  |
|        | 6th, a        | 198, 191, 196 | Neon Silver      | 4. C       | 1             | 133, 142, 156    | Manatee          |                  | 5             | 220, 184, 197 | Cameo Pink       |                  |
|        | 6th, b        | 203, 202, 207 | Lavender Gray    |            | 2             | 151, 162, 180    | Cadet Gray       |                  | 6             | 194, 196, 203 | Lavender Gray    |                  |
| 7th, a | 198, 197, 203 | Lavender Gray | 3                |            | 224, 173, 178 | Pale Chestnut    | 7                |                  | 219, 193, 204 | Queen Pink    |                  |                  |
| 7th, b | 201, 200, 206 |               | 4                |            | 156, 161, 173 | Cadet Gray       | 8                |                  | 216, 183, 195 |               |                  |                  |
| S29. A | 1             | 215, 164, 171 | Pale Chestnut    |            | 5             |                  | 166, 173, 188    | S30. A           | S31. A        | 1             | 191, 193, 202    | Lavender Gray    |
|        | 2             | 165, 173, 185 | Cadet Gray       |            | 6             | 166, 171, 188    | Lavender Gray    |                  |               | 2             | 209, 195, 210    | Languid Lavender |
|        | 3             | 178, 187, 201 | Light Steel Blue |            | 7             | 156, 161, 177    | Manatee          |                  |               | 3             | 198, 199, 211    | Lavender Gray    |
|        | 4             | 180, 189, 203 |                  |            | 8             | 218, 169, 176    | Pale Chestnut    |                  |               | 4             | 207, 208, 223    |                  |
|        | 5             | 186, 197, 207 | Pale Aqua        | 1          | 151, 162, 183 | Cadet Gray       | 5                |                  |               | 215, 218, 227 | Gainsboro        |                  |
|        | 6             | 188, 193, 204 | Lavender Gray    | 2          | 182, 181, 191 | Lavender Gray    | 6                |                  |               | 219, 220, 231 | Lavender Mist    |                  |
|        | 7             | 181, 188, 202 |                  | 3          | 177, 186, 199 | Light Steel Blue | 7                |                  |               | 207, 197, 209 | Languid Lavender |                  |
|        | 8             | 166, 178, 191 | Cadet Gray       | 4          | 183, 189, 201 | Lavender Gray    | 8                |                  |               | 210, 178, 193 | Thistle          |                  |
| S29. B | 1             | 196, 143, 155 | Puce             | S30. A     | 5             | 171, 181, 196    | Light Steel Blue | S31. B           | 1             | 190, 191, 199 | Lavender Gray    |                  |
|        | 2             | 184, 186, 196 | Lavender Gray    |            | 6             | 176, 185, 199    |                  |                  | 6             | 193, 194, 204 |                  |                  |
|        | 3             | 194, 199, 209 |                  |            | 7             | 161, 177, 194    | Cadet Gray       |                  | 3             | 200, 201, 211 |                  |                  |
|        | 4             | 195, 197, 206 |                  |            | 8             | 139, 152, 173    | Cool Gray        |                  | 4             | 205, 207, 217 |                  |                  |
|        | 5             | 201, 203, 215 |                  |            | 1             | 168, 177, 191    | Cadet Gray       |                  | 5             | 222, 222, 230 |                  | Gainsboro        |

| fig    | item | RGB code      | ~ color name  |
|--------|------|---------------|---------------|
| S31. B | 6    | 215, 218, 227 | Gainsboro     |
|        | 7    | 195, 195, 203 | Lavender Gray |
|        | 8    | 201, 202, 212 |               |
